# Supplementary material for: Association between measured teamwork and medical errors: an observational study of prehospital care in the USA
Source: PubMed Central journal article supplement — BMJ Open. 2019 Oct 31;9(10):e025314. doi: 10.1136/bmjopen-2018-025314 (PMC6830602; doi:10.1136/bmjopen-2018-025314), 2019-10-31
Supplement: bmjopen-2018-025314.draft_revisions.pdf [file bmjopen-2018-025314.draft_revisions.pdf]

# BMJ Open

BMJ Open is committed to open peer review. As part of this commitment we make the peer review history of every article we publish publicly available.

When an article is published we post the peer reviewers' comments and the authors' responses online. We also post the versions of the paper that were used during peer review. These are the versions that the peer review comments apply to.

The versions of the paper that follow are the versions that were submitted during the peer review process. They are not the versions of record or the final published versions. They should not be cited or distributed as the published version of this manuscript.

BMJ Open is an open access journal and the full, final, typeset and author-corrected version of record of the manuscript is available on our site with no access controls, subscription charges or pay-per-view fees (<http://bmjopen.bmj.com>).

If you have any questions on BMJ Open's open peer review process please email [info.bmjopen@bmj.com](mailto:info.bmjopen@bmj.com)

# BMJ Open

## Association between Measured Teamwork and Medical Errors: A Prospective Observational Study

|                               |                                                                                                                                                                                                                                                                                                                                                                                                                                                                                                                                                                                                                                                                                                                                                       |
|-------------------------------|-------------------------------------------------------------------------------------------------------------------------------------------------------------------------------------------------------------------------------------------------------------------------------------------------------------------------------------------------------------------------------------------------------------------------------------------------------------------------------------------------------------------------------------------------------------------------------------------------------------------------------------------------------------------------------------------------------------------------------------------------------|
| Journal:                      | <i>BMJ Open</i>                                                                                                                                                                                                                                                                                                                                                                                                                                                                                                                                                                                                                                                                                                                                       |
| Manuscript ID                 | bmjopen-2018-025314                                                                                                                                                                                                                                                                                                                                                                                                                                                                                                                                                                                                                                                                                                                                   |
| Article Type:                 | Research                                                                                                                                                                                                                                                                                                                                                                                                                                                                                                                                                                                                                                                                                                                                              |
| Date Submitted by the Author: | 09-Jul-2018                                                                                                                                                                                                                                                                                                                                                                                                                                                                                                                                                                                                                                                                                                                                           |
| Complete List of Authors:     | Herzberg, Simone; Vanderbilt University Medical Center, Medical Scientist Training Program<br>Hansen, Matt; Oregon Health and Science University, Emergency Medicine<br>Skarica, Barbara; Oregon Health and Science University, Obstetrics and Gynecology<br>McNulty, James; Oregon Health and Science University, Office of Simulation<br>Harrod, Tabria; Oregon Health and Science University, Obstetrics and Gynecology<br>Snowden, Jonathan M.; Oregon Health & Science University, Dept of Obstetrics & Gynecology/Public Health & Preventive Medicine<br>Lambert, William; Oregon Health and Science University, Public Health & Preventative Medicine<br>Guise, Jeanne-Marie ; Oregon Health and Science University, Obstetrics and Gynecology |
| Keywords:                     | Patient Safety, Medical Errors, Patient Care Team, Emergency Medical Services, Teamwork, Pediatric                                                                                                                                                                                                                                                                                                                                                                                                                                                                                                                                                                                                                                                    |
|                               |                                                                                                                                                                                                                                                                                                                                                                                                                                                                                                                                                                                                                                                                                                                                                       |

SCHOLARONE™  
Manuscripts

# Association between Measured Teamwork and Medical Errors: A Prospective Observational Study

**Authors:** Simone Herzberg<sup>1,2</sup>, Matthew Hansen<sup>3</sup>, Barbara Skarica<sup>2</sup>, James McNulty<sup>4</sup>, Tabria Harrod<sup>2</sup>, Jonathan M. Snowden<sup>2,5</sup>, William Lambert<sup>5</sup>, Jeanne-Marie Guise<sup>2,3,5,6</sup>

<sup>1</sup> *Vanderbilt School of Medicine, Nashville, TN USA*

<sup>2</sup> *Department of Obstetrics & Gynecology, Oregon Health & Science University School of Medicine, Portland, OR USA*

<sup>3</sup> *Department of Emergency Medicine, Oregon Health & Science University School of Medicine, Portland, OR USA*

<sup>4</sup> *Office of Simulation, Oregon Health & Science University, Portland, OR USA*

<sup>5</sup> *School of Public Health, Oregon Health & Science University/Portland State University School of Public Health, Portland, OR USA*

<sup>6</sup> *Department of Medical Informatics & Clinical Epidemiology, Oregon Health & Science University School of Medicine, Portland, OR USA*

**Keywords:** Patient Safety; Medical Errors; Cooperative Behavior; Patient Care Team; Emergency Medical Services; Teamwork; Patient Simulation; Child; Humans

**Corresponding Author:** Jeanne-Marie Guise, M.D., M.P.H., Department of Obstetrics & Gynecology, OHSU, Mail Code: L466, 3181 SW Sam Jackson Park Road, Portland, OR 97239. Tel: (503) 494-2101; Fax: (503) 494-5296; Email: guisej@ohsu.edu

**Word Count:** 2,616 (excluding title page, abstract, references, tables and figures)

**Author contributions:** All authors made substantial contributions in 1) the conception and design of the study, acquisition and/or analysis and interpretation of the data 2) drafting and revising the article for important content and 3) approving the submitted version. (see also detailed author contributions)

## ABSTRACT

### Objectives

The goal of this study was to examine the relationship between measured teamwork and adverse safety events in the prehospital emergency care of children using high-fidelity simulation. We posit that aspects of teamwork such as leadership, trust and communication are largely correlated with the clinical success of teams.

### Design

Observational study.

### Setting

Emergency Medical Services (EMS) responders were recruited from public fire and private transport agencies in Oregon State.

### Participants

Forty-four fire/transport teams consisting of 259 EMS professionals consented to participate and completed simulations.

### Primary and Secondary Outcome Measures

We estimated the odds of error with increasing Clinical Teamwork Score (CTS™), adjusting for clinical scenario and potential clustering.

### Results

Across 176 simulations, the mean overall score on the CTS™ was 6.04 (SD = 2.10; range 1 = poor to 10 = perfect) and was normally distributed. The distribution of scores was similar across the four clinical scenarios. At least one error was observed in 82% of the simulations. In simulations with at least one observed error, the mean CTS™ score was 5.76 (SD = 2.05) compared with 7.16 (SD = 1.95) in scenarios with no observed error. Logistic regression analysis

1  
2  
3 revealed the odds of an error decreased 28% with each unit increase in CTS™ score (Odds Ratio  
4 = 0.72, 95% CI 0.59 – 0.88). This relationship was not confounded by scenario.  
5  
6

## 7 **Conclusions**

8  
9  
10 This study found that overall teamwork among care delivery teams was strongly associated with  
11 the risk of serious adverse events in caring for critically ill and injured children.  
12  
13  
14  
15  
16  
17  
18  
19  
20  
21  
22  
23  
24  
25  
26  
27  
28  
29  
30  
31  
32  
33  
34  
35  
36  
37  
38  
39  
40  
41  
42  
43  
44  
45  
46  
47  
48  
49  
50  
51  
52  
53  
54  
55  
56  
57  
58  
59  
60

## STRENGTHS AND LIMITATIONS OF THIS STUDY

- This research provides some of the first data that quantifies the relationship between clinical teamwork and the likelihood of medical errors.
- These data suggest CTS™ may be a useful tool to measure the immediate impact of interventions on teamwork that matter to the reduction of errors.
- Simulations replicated pediatric emergencies known to be high risk for errors and were conducted using professional actors and high fidelity pediatric simulators in the field with clinical EMS teams assembled and responding as they normally would reflecting every day clinical care as closely as possible.
- The appraisal of errors and assignment of teamwork scores were performed by clinicians who were not involved in EMS but were humans using their best judgement, which is a method subject to bias
- It remains uncertain whether poorer teamwork is the cause of errors or if it is simply associated with other deficits in performance that may be contributing, however, this finding provides a tool that can be used to measure impact before and after interventions.

## INTRODUCTION

Medical errors, the failure of a planned action to be completed as intended or the use of a wrong plan to achieve an aim,[1] are estimated to be the third leading cause of death in the United States.[2] Medicine is both an important and imperfect field, combining science with art and humans with technology. In 1999, the world became aware that patients not only die from disease and traumatic events, some also die or are injured unintentionally through the provision of clinical care.[3] The landmark Institute of Medicine report estimated that the number of Americans who die every year due to preventable medical errors is equivalent to 3 jumbo jet crashes every 2 days, or one patient every 15 minutes, with over 1 million estimated to be harmed. Studies of medical errors have generally focused on adults and inpatient settings. However, medical errors are also an important source of harm for pediatric patients with estimates of 70,000 pediatric inpatients harmed per year by medical errors.[4, 5] Even less is known about the epidemiology, etiology, and risk factors for preventable adverse events in the care of children in the Emergency Medical Services (EMS) system where children first receive care for emergencies outside of the hospital.

Good communication and teamwork are critical in avoiding medical errors and assuring the safety of patients. Past reviews have indicated that aspects of teamwork such as leadership, trust and communication are largely correlated with the clinical success of teams.[6-8] For example, a study evaluating teamwork in the Intensive Care Unit indicated that 37% of teamwork failures were due to verbal communication errors between physicians and nurses.[9] There have been interventions to reduce medical errors such as implementing computerized provider order-entry systems, limiting residents' work shifts to consecutive hours, and implementing evidence-based

1  
2  
3 care bundles. A large retrospective study from the VA found that inpatient surgical mortality was  
4 reduced 18% following team training interventions.[10] However, lack of prospective and  
5 detailed evaluation of teamwork elements and specific errors limit our understanding of the  
6 effectiveness of these practices.[11] The goal of this study was to examine the relationship  
7 between measured teamwork and adverse safety events in the prehospital emergency care of  
8 children using high-fidelity simulation.  
9  
10  
11  
12  
13  
14  
15  
16  
17  
18

## 19 **METHODS**

20  
21 We followed STROBE guidance for reporting of observational studies.[12] The Oregon Health  
22 & Science University Institutional Review Board (IRB00006942) approved the study and all  
23 subjects signed both study and video consent prior to participation.  
24  
25  
26  
27  
28  
29  
30

### 31 **Study Participants**

32  
33 In total, 176 simulations were performed over a 6-month timeframe with 44 teams of emergency  
34 medical services (EMS) providers recruited from public fire and private transport crews in three  
35 large counties surrounding Portland, Oregon in the United States. Portland is the largest city in  
36 Oregon and the three county area that participated in this study serves a population of 1.8  
37 million. The EMS system in this region has dual-Advanced Life Support response to all 911  
38 calls with public fire agencies, responding in teams of 3-5 individuals with at least one  
39 paramedic, and a private transport agency, responding in 2-person teams with at least one  
40 paramedic. We conducted all simulations *in situ* with both fire and transport EMS teams  
41 responding to each scenario as they normally would when providing clinical care. Participants  
42  
43  
44  
45  
46  
47  
48  
49  
50  
51  
52  
53  
54  
55  
56  
57  
58  
59  
60



1  
2  
3 ranged from Emergency Medical Technician (EMT) to paramedic, with each team including at  
4  
5 least one paramedic.  
6  
7  
8  
9

10 Forty-four fire/transport teams consisting of 259 EMS professionals were available in the three-  
11 county region during our study timeframe and consented to participate. All who consented  
12 completed the study. One individual withdrew consent to have his/her individual data analyzed  
13 after completing the simulation sessions for personal reasons, but agreed to analysis of team-  
14 level data for all simulation sessions he/she had participated. In total, we analyzed team-level  
15 data from 44 teams and individual-level data from 258 EMS professionals.  
16  
17  
18  
19  
20  
21  
22  
23  
24  
25

### 26 **Patient Involvement**

27  
28 The EMS-C Children's Safety Initiative is an observational study with a specific focus on EMS  
29 providers. Patients were not involved in the design, recruitment, or conduct of the study.  
30  
31  
32  
33  
34

### 35 **Simulations**

36  
37 Each fire/ambulance team participated in four simulation scenarios: (1) cardiac arrest in newborn  
38 (Newborn Resuscitation Program, NRP), (2) cardiac arrest in child (Pediatric Advanced Life  
39 Support PALS), (3) non-accidental trauma (NAT), and (4) accidental trauma from pedestrian-  
40 motor vehicle collision (MVC). We conducted all simulations *in situ* at local EMS training  
41 centers all scenes and patient simulators were staged in standardized formats. In the NRP  
42 scenario, the patient presented as a newborn who was initially responsive upon delivery but  
43 subsequently developed a weak cry, flaccid extremities, bradycardia, and cyanosis requiring  
44 resuscitation. For the PALS case, the patient presented as a six-year-old boy with symptomatic  
45  
46  
47  
48  
49  
50  
51  
52  
53  
54  
55  
56  
57  
58  
59  
60

1  
2  
3 bradycardia that progressed to pulseless electrical activity with a reported history of  
4  
5 developmental disabilities, seizures, and cerebral palsy, living in a care facility. In the NAT case,  
6  
7 a six-month-old patient had “fallen” from the couch and was unconscious and unresponsive with  
8  
9 bruising consistent with inflicted injury. In the MVC scenario, the patient was a three-month-old  
10  
11 child who, while in a stroller, was stuck by a car. The patient had a large scalp wound and was  
12  
13 initially crying but shortly after developed decreased responsiveness, hypertension, bradycardia,  
14  
15 and slow respirations. The simulators used for scenarios included the Victoria™ birthing patient  
16  
17 simulator and the Newborn Hal™ simulator from Gaumard™, and Sim Jr.™ 6-year-old child  
18  
19 and sim NewB™ newborn simulators from Laerdal™. Makeup was used to simulate bruising,  
20  
21 bleeding and lacerations in a standardized manner for each scenario. Each scenario followed a  
22  
23 previously determined algorithm for improvement or decompensation of the patient’s status  
24  
25 along pre-specified time intervals according to performance of specific critical actions also  
26  
27 specified in advance. All scenarios were pilot tested among EMS teams who did not  
28  
29 subsequently participate in the study. Scenarios were revised as needed based on feedback from  
30  
31 pilot testing. Professionally trained actors played all confederate roles in the scenarios to enhance  
32  
33 realism.  
34  
35  
36  
37  
38  
39  
40  
41

42 Simulation scenarios concluded after approximately 10 minutes for standardization purposes. If  
43  
44 the team initiated a procedure close to the 10-minute mark, such as calculating and drawing up a  
45  
46 medication, the simulation was allowed to continue to complete observation of the task in  
47  
48 process and reduce the chances of an awkward end to the scenario. If the care protocols  
49  
50 proceeded rapidly, and the condition of the patient was stable and transport action had begun, the  
51  
52  
53  
54  
55  
56  
57  
58  
59  
60

1  
2  
3 simulation could be concluded before the 10-minute point. After finishing all four scenarios,  
4  
5 teams returned for a 30-minute debriefing session.  
6  
7  
8  
9

10 Simulation scenarios were presented to teams in random order to minimize the potential bias that  
11  
12 may occur from conditioning as teams become familiar with the simulators and working with  
13  
14 each other. Fire and transport crews responded to each scenario in their own fire engines and  
15  
16 ambulances after receiving a scripted radio dispatch. Each crew used their own equipment or  
17  
18 alternatively used training kits that were replicas of the kits they usually carry. The crews varied  
19  
20 who arrived on scene first and at times arrived simultaneously to mimic local practice. Crews  
21  
22 were able to move the patient simulators to the transport vehicle and mimic patient transport to  
23  
24 the hospital. If transport was started, the crews would assign a driver and those who remained  
25  
26 inside the transport vehicle would continue to administer patient care. All crews were aware they  
27  
28 were participating in simulated emergencies and were oriented to the study and mannequins prior  
29  
30 to participation. To allow for anonymous tracking of each participant by role, the crew members  
31  
32 wore colored tape markers on their shoulders.  
33  
34  
35  
36  
37  
38  
39  
40  
41  
42  
43  
44  
45  
46  
47  
48  
49  
50  
51  
52  
53  
54  
55  
56  
57  
58  
59  
60

## Data Collection

Prior to simulations, participants completed a survey asking about demographic characteristics, training and their experience in Emergency Medical Services.

Subject matter experts (SMEs) directly observed simulations in real time and measured teamwork using the Clinical Teamwork Scale (CTS<sup>TM</sup>), a validated instrument that measures overall teamwork and 15 specific elements in 5 overarching domains: communication, decision, making, role responsibility (leadership and followership), situational awareness/resource management and patient-friendliness.[13] Teamwork performance is evaluated on a scale of zero (unacceptable) to 10 (perfect).

## Error Measurement

During the simulations, the SMEs noted the number of errors and described what the error entailed using standard taxonomy. For purposes of this study, errors were collapsed into whether an error was present or not present. When there was uncertainty over whether an action may or may not have constituted an error, the team discussed to reach consensus.

## Statistical analysis

We summarized error proportion by each simulated clinical scenario, and summarized teamwork (CTS<sup>TM</sup> teamwork score) by the presence or absence of an error. We summarized teamwork as the overall CTS<sup>TM</sup> score and also by each score in the five sub-domains of the CTS<sup>TM</sup>. Scores were compared between groups using the Wilcoxon-Mann-Whitney test. We first used a univariate logistic regression model to estimate the odds of error with increasing CTS<sup>TM</sup> score

and then used a multivariable regression to estimate the odds of error with increasing CTS<sup>TM</sup> score while adjusting for scenario. We used a generalized estimate equation (GEE) model with an exchangeable correlation structure to account for potential clustering. Completed case analysis was used and a *p*-value of <0.05 was considered statistically significant.

## RESULTS

Table 1 shows demographic characteristics and self-reported professional experience of EMS responders participating in the simulation sessions.

**Table 1: Characteristics of EMS Personnel Participating in Simulations**

| Characteristic                            | N (%) |        |
|-------------------------------------------|-------|--------|
| Mean Age years (S.D) <sup>a</sup>         | 36.9  | (8.47) |
| Gender <sup>b</sup>                       |       |        |
| Female                                    | 36    | (14.0) |
| Race/Ethnicity <sup>c</sup>               |       |        |
| White                                     | 220   | (89.1) |
| Black or African American                 | 0     | (0)    |
| American Indian or Alaska Native          | 6     | (2.43) |
| Asian                                     | 4     | (1.62) |
| Native Hawaiian or Other Pacific Islander | 2     | (0.81) |
| Hispanic or Latino                        | 7     | (2.83) |
| Other/Two or More Races                   | 8     | (3.24) |
| Training Level <sup>b</sup>               |       |        |

|                                                                                      |      |        |
|--------------------------------------------------------------------------------------|------|--------|
| Emergency Medical Responder (EMR)                                                    | 0    | (0)    |
| Emergency Medical Technician (EMT)                                                   | 100  | (38.9) |
| Advanced EMT                                                                         | 2    | (0.78) |
| EMT-Intermediate                                                                     | 25   | (9.73) |
| Paramedic                                                                            | 128  | (49.8) |
| Paramedic Intern                                                                     | 2    | (0.78) |
| Years' Experience Working in EMS <sup>d</sup>                                        | 11.7 | (7.84) |
| Proficiency in Pediatric EMS on a Scale of 1 ("Novice") to 5 ("Expert") <sup>b</sup> | 2.55 | (0.89) |

a) n = 256, b) EMS n = 257, c) n = 247, d) n = 258

At least one error was observed in 82% of the 176 simulation scenarios for which the presence or absence of errors was recorded. Table 2 describes the types of errors observed.

**Table 2: Taxonomy of Observed Errors**

| <b>Errors</b>                             | <b>Type</b>                                                                 |
|-------------------------------------------|-----------------------------------------------------------------------------|
| <b><i>Diagnostic &amp; Management</i></b> | Assessment, algorithm, diagnostic, management, decision making              |
| <b><i>Medication</i></b>                  | Wrong medication, dose, route, sequence, type, IV fluid issue, etc.         |
| <b><i>Technical</i></b>                   | Wrong device, size, bagging, intubation, CPR, defibrillator, immobilization |
| <b><i>Scene/Environment</i></b>           | Scene safety, scene time, positioning, patient/family                       |

The overall CTS™ score was normally distributed, with a mean of 6.04 (SD = 2.10; min = 1 (poor) and max = 10 (perfect)) in the 170 simulations with recorded overall CTS™ scores. The distributions of overall CTS™ scores were similar across the four scenarios. In simulations with an overall CTS™ score and at least one observed error (n = 138), the mean CTS™ score was 5.76 (SD = 2.05) compared with 7.16 (SD = 1.95) in scenarios with no observed error (n = 32). The Wilcoxon-Mann-Whitney test demonstrated that this difference was statistically significant (P<0.001). For each individual simulation scenario, teams with no errors had higher CTS™ scores than teams with one or more errors. There were statistically significant increases in CTS™ scores in teams with no errors in the Non-Accidental Trauma simulation and the Newborn Cardiac Arrest simulation compared to those with at least one error. Table 3 provides comparative data for CTS scores with and without errors by simulation scenario.

**Table 3: CTS™ Overall Teamwork Score in Simulations with and without Any Observed Error**

| Simulation Scenario         | No Error (mean, SD) | One or More Errors (mean, SD) | P Value |
|-----------------------------|---------------------|-------------------------------|---------|
| Motor Vehicle Collision     | 6.20 (2.25)         | 5.91 (1.96)                   | 0.74    |
| Non-Accidental Trauma       | 8.20 (1.10)         | 5.57 (2.03)                   | <0.01   |
| Newborn Cardiac Arrest      | 7.55 (1.97)         | 5.79 (2.18)                   | 0.01    |
| Six-Year-Old Cardiac Arrest | 7.17 (1.60)         | 5.78 (2.09)                   | 0.15    |
| All Simulations             | 7.16 (1.95)         | 5.76 (2.05)                   | <0.001  |

Logist  
ic  
regres

sion analysis revealed that the odds of an error decreased 28% with each unit increase in CTS™ (Odds Ratio = 0.72, 95% Confidence Interval 0.59 – 0.88). This relationship was not confounded by scenario. Within the simulations, the percentage of teams that completed a simulation without error was highest in the Newborn Cardiac Arrest simulation (25%). The simulation with the

highest percentage of teams with one or more error was the Non-Accidental Trauma simulation, with 89% of simulation having at least one error. Bivariable analysis suggested that adverse safety events are more likely in teams with low teamwork scores.

Adverse safety events were also more likely in teams with lower individual scores in communication, situational awareness, decision-making, and leadership/followership (Table 4).

**Table 4: CTS™ Domain-specific Ratings in Simulations with and without Any Observed Error**

| Error<br><i>CTS™ Item</i>                                   | CTS™ Item Rating               |                                          |                |
|-------------------------------------------------------------|--------------------------------|------------------------------------------|----------------|
|                                                             | <i>No Error<br/>(mean, SD)</i> | <i>One or More Errors<br/>(mean, SD)</i> | <i>P Value</i> |
| Overall Communication <sup>a</sup>                          | 7.13 (2.21)                    | 5.89 (2.00)                              | 0.002          |
| Overall Situational Awareness <sup>b</sup>                  | 7.31 (2.07)                    | 6.26 (2.25)                              | 0.01           |
| Overall Decision Making <sup>c</sup>                        | 7.26 (2.07)                    | 5.49 (2.35)                              | <0.001         |
| Overall Role Responsibility<br>(Leader/Helper) <sup>d</sup> | 7.25 (1.74)                    | 6.06 (1.92)                              | 0.001          |
| Patient Friendliness <sup>d</sup>                           | 7.13 (2.56)                    | 6.44 (2.17)                              | 0.16           |

a) n = 160, b) n = 170, c) n = 167, d) n = 163

Compared with teams with one or more errors, teams without any errors had higher CTS™ scores across all itemized categories of the CTS™ (Overall Communication, Overall Situational Awareness, Overall Decision making, Overall Role Responsibility, and Patient Friendliness).

Among these categories, the Wilcoxon-Mann-Whitney test revealed that teams with no error had significantly higher CTS™ scores for Overall Communication, Overall Situational Awareness, Overall Decision Making, and Overall Role Responsibility (Leadership/Helper).

## DISCUSSION

In this study of simulated pediatric prehospital emergencies, we observed a higher frequency of errors in teams with lower-rated teamwork scores. This finding was observed consistently across



1  
2  
3 a variety of clinical scenarios (e.g., both newborn cardiac arrest and non-accidental trauma) and  
4 teamwork sub-domains (e.g., communication and situational awareness). Our study builds on the  
5  
6 prior research on the role of teamwork in medical errors, which has mostly been conducted in the  
7  
8 hospital setting. Using high-fidelity simulation scenarios and a validated teamwork measurement  
9  
10 tool, we extended this research to the pediatric prehospital emergency care setting, and found  
11  
12 that teamwork was a significant contributor to medical errors.  
13  
14  
15

16  
17  
18  
19 The results were robust to multivariable regression adjustment, suggesting that breakdowns in  
20  
21 teamwork are indeed a factor contributing to the high error rates observed in this study. These  
22  
23 findings provide a nice complement to the work on surgical mortality and team training[10] as  
24  
25 this provides a mechanism to measure the immediate intervening factors that are likely in the  
26  
27 causal pathway. Given the large cost and morbidity burden associated with medical errors in our  
28  
29 US healthcare system, these findings suggest directions for future research and also have policy  
30  
31 implications. Most immediately, more studies are needed to confirm this association both in this  
32  
33 specific healthcare setting as well as other clinical areas where team-based care is the norm. For  
34  
35 example, future studies should examine the contribution of teamwork to medical errors in  
36  
37 hospital emergency medical care to continue building our understanding of the role of teamwork  
38  
39 beyond the ICU. We used a validated measure of teamwork, the CTS™; future studies should  
40  
41 utilize this measure and also continue to refine methods for measuring the multi-modal concept  
42  
43 of teamwork. Given the complexity of teamwork and the inherent challenges in measuring it  
44  
45 (e.g., different evaluations based on different parties, the limitations of self-reported/self-scored  
46  
47 data, etc.), additional research will be needed to provide a full picture of the role of teamwork in  
48  
49  
50  
51  
52  
53  
54  
55  
56  
57  
58  
59  
60

1  
2  
3 patient outcomes. In clinical settings where our findings are replicated, it will be essential to  
4  
5 consider interventions, training, and policies to prevent teamwork-associated medical errors.  
6  
7

8  
9  
10 There are several important limitations to consider. We conducted simulations and measured  
11  
12 teamwork in one geographic region with a specific EMS system design which may not be  
13  
14 representative of other areas. Although we employed best-practices in conducting our  
15  
16 simulations and measuring teamwork (e.g., cutting-edge simulation models, the use of trained  
17  
18 actors, a validated teamwork measurement scale), our study still examined simulated healthcare  
19  
20 encounters, rather than actual healthcare. However, due to the rare nature of critical pediatric  
21  
22 emergencies in EMS, direct observation of care is not feasible on this scale. Next, we do not  
23  
24 know if poorer teamwork is the cause of errors or if it is simply associated with other deficits in  
25  
26 performance that may be contributing, such as medical knowledge. Further, the appraisal of  
27  
28 errors and assignment of teamwork scores were performed by humans using their best  
29  
30 judgement, which is a method subject to bias. Finally, while the amount of missing data were  
31  
32 small, we dealt with missing data using complete-case analysis. The analytic approach to missing  
33  
34 data continues to be a subject of active investigation with recent writings suggesting that the best  
35  
36 approach is to think through the likely causes of bias and select the analytic method that is least  
37  
38 likely to introduce bias and best able to reduce bias.[14] Although several options are available  
39  
40 for addressing missingness (e.g., multiple imputation approaches), several features of our  
41  
42 specific data raised questions about the applicability of these approaches in our study. Our data  
43  
44 structure includes nested, non-independent observations, where the same clinical team  
45  
46 participated in clinically distinct simulations and different clinical teams participated in each  
47  
48 clinical simulation. Given this, it did not seem appropriate to impute scores from other clinical  
49  
50  
51  
52  
53  
54  
55  
56  
57  
58  
59  
60

1  
2  
3 teams in the same clinical scenario to the team with missing data, as this would assume that the  
4 clinical performance of teams was homogeneous. In the same note, it did not seem appropriate to  
5 assume that one clinical team would perform similarly on clinical cases that were very distinct.  
6  
7 Given that neither of these assumptions seemed appropriate and also that our total number of  
8 missing data was small, the most honest interpretation of our data seemed to be complete case  
9 analysis. In conclusion, we found that teamwork is highly correlated with errors in simulated  
10 pediatric prehospital emergencies and this finding was robust across four different simulation  
11 scenarios as well as across sub-domains of teamwork.  
12  
13  
14  
15  
16  
17  
18  
19  
20  
21  
22  
23

## 24 **CONCLUSION**

25  
26 Overall teamwork is strongly associated with the risk of adverse events in critically ill and  
27 injured children.  
28  
29  
30  
31  
32  
33  
34  
35  
36  
37  
38  
39  
40  
41  
42  
43  
44  
45  
46  
47  
48  
49  
50  
51  
52  
53  
54  
55  
56  
57  
58  
59  
60

## DECLARATIONS

### Acknowledgements

None

### Ethics approval and consent to participate

The study was approved by Oregon Health & Science University's Institutional Review Board, IRB Approval# 00006942.

### Competing interests

The authors have no conflict of interest to report.

### Funding

This work was supported by the National Institute of Child Health and Human Development, Grant No. 1R01HD062478.

**Data Sharing:** No additional data are available.

**Author Contributions:** All authors contributed significantly to this work. SH is first author. JMG and WL obtained funding. SH, MH, BS, JS, JM, WL, and JMG conceived and designed the study. SH, MH, BS, JM, TH, WL, and JMG performed the simulations and participated in acquisition of data. SH, BS, JS, and JMG analyzed the data. SH, BS, JS, WL, and JMG wrote the first draft of the paper. All authors have read, edited, and approved the final manuscript and are able to accept responsibility for the work.

**REFERENCES CITED**

1. Quality Interagency Coordination Task Force. Doing what counts for patient safety: Federal actions to reduce medical errors and their impact Rockville, MD: Agency for Healthcare and Research Quality; [cited 2017 May 12]. Available from: <https://archive.ahrq.gov/quic/report/mederr4.htm>.
2. Makary M, Daniel M. Medical error-the third leading cause of death in the US. *BMJ*. 2016;353:i2139.
3. Committee on Quality of Health Care in America. To err is human: Building a safer health system. Medicine Io, editor. Washington, DC: National Academy Press; 1999.
4. Kaushal R, Bates D, Landrigan C. Medication errors and adverse drug events in pediatric inpatients. *JAMA*. 2001;285(16):2114-20.
5. Woods D, Thomas E, Holl J, al. e. Adverse events and preventable adverse events in children. *Pediatrics*. 2005;115(1):155-60.
6. Baker D, Gustafson S, Beaubien J, al. e. Medical teamwork and patient safety: The evidence-based relation. Rockville, MD: Agency for Healthcare and Research Quality, 2005.
7. Manser T. Teamwork and patient safety in dynamic domains of healthcare: A review of the literature. *Acta Anaesthesiol Scand*. 2009;53(2):143-51.
8. Sorbero M, Farley D, Mattke S, al. e. Outcomes measures for effective teamwork in inpatient care. Santa Monica, CA: RAND Corporation, 2008.
9. Donchin Y, Gopher D, Olin M, al. e. A look into the nature and causes of human errors in the intensive care unit. *Crit Care Med*. 1995;23(2):294-300.

- 1  
2  
3 10. Neily J, Mills P, Young-Xu Y, Carney B, West P, Berger D, et al. Association between  
4 implementation of a medical team training program and surgical mortality. JAMA.  
5  
6 2010;304(15):1693-700.  
7  
8  
9  
10 11. Landrigan C. Resident sleep deprivation and critical care: the unintended consequences of  
11 inaction. Crit Care Med. 2010;38(3):980-1.  
12  
13  
14 12. von Elm E, Altman D, Egger M, Pocock S, Gøtzsche P, Vandenbroucke J. The Strengthening  
15 the Reporting of Observational Studies in Epidemiology (STROBE) statement: guidelines for  
16 reporting observational studies. PLoS Med. 2007;4(10):e296.  
17  
18  
19 13. Guise J, Deering S, Kanki B, al. e. Validation of a tool to measure and promote clinical  
20 teamwork. Simul Healthc. 2008;3(4):217-23.  
21  
22  
23  
24 14. Hernán M, Robins J. Per-protocol analyses of pragmatic trials. N Engl J Med.  
25  
26 2017;377(14):1391-8.  
27  
28  
29  
30  
31  
32  
33  
34  
35  
36  
37  
38  
39  
40  
41  
42  
43  
44  
45  
46  
47  
48  
49  
50  
51  
52  
53  
54  
55  
56  
57  
58  
59  
60

## STROBE Statement—checklist of items that should be included in reports of observational studies

|                              | Item No | Recommendation                                                                                                                                                                             | Page #   |
|------------------------------|---------|--------------------------------------------------------------------------------------------------------------------------------------------------------------------------------------------|----------|
| <b>Title and abstract</b>    | 1       | (a) Indicate the study's design with a commonly used term in the title or the abstract                                                                                                     | 1        |
|                              |         | (b) Provide in the abstract an informative and balanced summary of what was done and what was found                                                                                        | 2        |
| <b>Introduction</b>          |         |                                                                                                                                                                                            |          |
| Background/rationale         | 2       | Explain the scientific background and rationale for the investigation being reported                                                                                                       | 4-5      |
| Objectives                   | 3       | State specific objectives, including any prespecified hypotheses                                                                                                                           | 5        |
| <b>Methods</b>               |         |                                                                                                                                                                                            |          |
| Study design                 | 4       | Present key elements of study design early in the paper                                                                                                                                    | 5-6      |
| Setting                      | 5       | Describe the setting, locations, and relevant dates, including periods of recruitment, exposure, follow-up, and data collection                                                            | 6        |
| Participants                 | 6       | (a) <i>Cohort study</i> —Give the eligibility criteria, and the sources and methods of selection of participants. Describe methods of follow-up                                            | 6        |
|                              |         | <i>Case-control study</i> —Give the eligibility criteria, and the sources and methods of case ascertainment and control selection. Give the rationale for the choice of cases and controls |          |
|                              |         | <i>Cross-sectional study</i> —Give the eligibility criteria, and the sources and methods of selection of participants                                                                      |          |
|                              |         | (b) <i>Cohort study</i> —For matched studies, give matching criteria and number of exposed and unexposed                                                                                   | NA       |
|                              |         | <i>Case-control study</i> —For matched studies, give matching criteria and the number of controls per case                                                                                 |          |
| Variables                    | 7       | Clearly define all outcomes, exposures, predictors, potential confounders, and effect modifiers. Give diagnostic criteria, if applicable                                                   | 7-10     |
| Data sources/<br>measurement | 8*      | For each variable of interest, give sources of data and details of methods of assessment (measurement). Describe comparability of assessment methods if there is more than one group       | 9        |
| Bias                         | 9       | Describe any efforts to address potential sources of bias                                                                                                                                  | 8-9      |
| Study size                   | 10      | Explain how the study size was arrived at                                                                                                                                                  | 6-7      |
| Quantitative variables       | 11      | Explain how quantitative variables were handled in the analyses. If applicable, describe which groupings were chosen and why                                                               | 10-11    |
| Statistical methods          | 12      | (a) Describe all statistical methods, including those used to control for confounding                                                                                                      | 10-11    |
|                              |         | (b) Describe any methods used to examine subgroups and interactions                                                                                                                        | 10-11    |
|                              |         | (c) Explain how missing data were addressed                                                                                                                                                | 10,11,16 |
|                              |         | (d) <i>Cohort study</i> —If applicable, explain how loss to follow-up was addressed                                                                                                        | NA       |
|                              |         | <i>Case-control study</i> —If applicable, explain how matching of cases and controls was addressed                                                                                         |          |
|                              |         | <i>Cross-sectional study</i> —If applicable, describe analytical methods taking account of sampling strategy                                                                               |          |
|                              |         | (e) Describe any sensitivity analyses                                                                                                                                                      | NA       |

Continued on next page

| <b>Results</b>           |     |                                                                                                                                                                                                              | <b>Page<br/>#</b> |
|--------------------------|-----|--------------------------------------------------------------------------------------------------------------------------------------------------------------------------------------------------------------|-------------------|
| Participants             | 13* | (a) Report numbers of individuals at each stage of study—eg numbers potentially eligible, examined for eligibility, confirmed eligible, included in the study, completing follow-up, and analysed            | 7                 |
|                          |     | (b) Give reasons for non-participation at each stage                                                                                                                                                         | 7                 |
|                          |     | (c) Consider use of a flow diagram                                                                                                                                                                           | NA                |
| Descriptive data         | 14* | (a) Give characteristics of study participants (eg demographic, clinical, social) and information on exposures and potential confounders                                                                     | 7,11,<br>12       |
|                          |     | (b) Indicate number of participants with missing data for each variable of interest                                                                                                                          | 12                |
|                          |     | (c) <i>Cohort study</i> —Summarise follow-up time (eg, average and total amount)                                                                                                                             | (NA)              |
| Outcome data             | 15* | <i>Cohort study</i> —Report numbers of outcome events or summary measures over time                                                                                                                          | (12-<br>15)       |
|                          |     | <i>Case-control study</i> —Report numbers in each exposure category, or summary measures of exposure                                                                                                         | NA                |
|                          |     | <i>Cross-sectional study</i> —Report numbers of outcome events or summary measures                                                                                                                           | NA                |
| Main results             | 16  | (a) Give unadjusted estimates and, if applicable, confounder-adjusted estimates and their precision (eg, 95% confidence interval). Make clear which confounders were adjusted for and why they were included | (12-<br>15)       |
|                          |     | (b) Report category boundaries when continuous variables were categorized                                                                                                                                    | (12-<br>15)       |
|                          |     | (c) If relevant, consider translating estimates of relative risk into absolute risk for a meaningful time period                                                                                             | NA                |
| Other analyses           | 17  | Report other analyses done—eg analyses of subgroups and interactions, and sensitivity analyses                                                                                                               | NA                |
| <b>Discussion</b>        |     |                                                                                                                                                                                                              |                   |
| Key results              | 18  | Summarise key results with reference to study objectives                                                                                                                                                     | 14-<br>15         |
| Limitations              | 19  | Discuss limitations of the study, taking into account sources of potential bias or imprecision. Discuss both direction and magnitude of any potential bias                                                   | 16                |
| Interpretation           | 20  | Give a cautious overall interpretation of results considering objectives, limitations, multiplicity of analyses, results from similar studies, and other relevant evidence                                   | 17                |
| Generalisability         | 21  | Discuss the generalisability (external validity) of the study results                                                                                                                                        | 15-<br>16         |
| <b>Other information</b> |     |                                                                                                                                                                                                              |                   |
| Funding                  | 22  | Give the source of funding and the role of the funders for the present study and, if applicable, for the original study on which the present article is based                                                | 18                |

\*Give information separately for cases and controls in case-control studies and, if applicable, for exposed and unexposed groups in cohort and cross-sectional studies.



# BMJ Open

## Association between Measured Teamwork and Medical Errors: An Observational Study of Prehospital Care in the United States

|                                 |                                                                                                                                                                                                                                                                                                                                                                                                                                                                                                                                                                                                                                                                                                                                                                                                                                              |
|---------------------------------|----------------------------------------------------------------------------------------------------------------------------------------------------------------------------------------------------------------------------------------------------------------------------------------------------------------------------------------------------------------------------------------------------------------------------------------------------------------------------------------------------------------------------------------------------------------------------------------------------------------------------------------------------------------------------------------------------------------------------------------------------------------------------------------------------------------------------------------------|
| Journal:                        | <i>BMJ Open</i>                                                                                                                                                                                                                                                                                                                                                                                                                                                                                                                                                                                                                                                                                                                                                                                                                              |
| Manuscript ID                   | bmjopen-2018-025314.R1                                                                                                                                                                                                                                                                                                                                                                                                                                                                                                                                                                                                                                                                                                                                                                                                                       |
| Article Type:                   | Original research                                                                                                                                                                                                                                                                                                                                                                                                                                                                                                                                                                                                                                                                                                                                                                                                                            |
| Date Submitted by the Author:   | 10-May-2019                                                                                                                                                                                                                                                                                                                                                                                                                                                                                                                                                                                                                                                                                                                                                                                                                                  |
| Complete List of Authors:       | Herzberg, Simone; Vanderbilt University Medical Center, Medical Scientist Training Program<br>Hansen, Matt; Oregon Health and Science University, Emergency Medicine<br>Schoonover, Amanda; Oregon Health and Science University, Obstetrics and Gynecology<br>Skarica, Barbara; Oregon Health and Science University, Obstetrics and Gynecology<br>McNulty, James; Oregon Health and Science University, Office of Simulation<br>Harrod, Tabria; Oregon Health and Science University, Obstetrics and Gynecology<br>Snowden, Jonathan M.; Oregon Health & Science University, Dept of Obstetrics & Gynecology/Public Health & Preventive Medicine<br>Lambert, William; Oregon Health and Science University, Public Health & Preventative Medicine<br>Guise, Jeanne-Marie ; Oregon Health and Science University, Obstetrics and Gynecology |
| <b>Primary Subject Heading</b>: | Public health                                                                                                                                                                                                                                                                                                                                                                                                                                                                                                                                                                                                                                                                                                                                                                                                                                |
| Secondary Subject Heading:      | Emergency medicine, Health services research, Paediatrics                                                                                                                                                                                                                                                                                                                                                                                                                                                                                                                                                                                                                                                                                                                                                                                    |
| Keywords:                       | Patient Safety, Medical Errors, Patient Care Team, Emergency Medical Services, Teamwork, Pediatric                                                                                                                                                                                                                                                                                                                                                                                                                                                                                                                                                                                                                                                                                                                                           |
|                                 |                                                                                                                                                                                                                                                                                                                                                                                                                                                                                                                                                                                                                                                                                                                                                                                                                                              |

SCHOLARONE™  
Manuscripts

# Association between Measured Teamwork and Medical Errors: An Observational Study of Prehospital Care in the United States

**Authors:** Simone Herzberg<sup>1,2</sup>, Matthew Hansen<sup>3</sup>, Amanda Schoonover<sup>2</sup>, Barbara Skarica<sup>2</sup>, James McNulty<sup>4</sup>, Tabria Harrod<sup>2</sup>, Jonathan M. Snowden<sup>2,5</sup>, William Lambert,<sup>5</sup> Jeanne-Marie Guise<sup>2,3,5,6</sup>

<sup>1</sup>*Vanderbilt School of Medicine, Nashville, TN USA*

<sup>2</sup>*Department of Obstetrics & Gynecology, Oregon Health & Science University School of Medicine, Portland, OR USA*

<sup>3</sup>*Department of Emergency Medicine, Oregon Health & Science University School of Medicine, Portland, OR USA*

<sup>4</sup>*Office of Simulation, Oregon Health & Science University, Portland, OR USA*

<sup>5</sup>*Oregon Health & Science University-Portland State University School of Public Health, Portland, OR USA*

<sup>6</sup>*Department of Medical Informatics & Clinical Epidemiology, Oregon Health & Science University School of Medicine, Portland, OR USA*

**Keywords:** Patient Safety; Medical Errors; Cooperative Behavior; Patient Care Team; Emergency Medical Services; Teamwork; Patient Simulation; Child; Humans

**Corresponding Author:** Jeanne-Marie Guise, M.D., M.P.H., Department of Obstetrics & Gynecology, OHSU, Mail Code: L466, 3181 SW Sam Jackson Park Road, Portland, OR 97239. Tel: (503) 494-2101; Fax: (503) 494-5296; Email: guisej@ohsu.edu

**Word Count:** 2,616 (excluding title page, abstract, references, tables and figures)

## ABSTRACT

### Objectives

1  
2  
3 The goal of this study was to examine the relationship between measured teamwork and adverse  
4 safety events in the prehospital emergency care of children using high-fidelity simulation. We  
5  
6 posit that aspects of teamwork such as leadership, trust and communication are largely correlated  
7  
8 with the clinical success of teams.  
9  
10

## 11 **Design**

12  
13  
14 Observational study.  
15

## 16 **Setting**

17  
18  
19 Emergency Medical Services (EMS) responders were recruited from public fire and private  
20  
21 transport agencies in Oregon State. Simulations were conducted *in situ* using high-fidelity patient  
22  
23 simulators, scene design, and professional actors playing parents and bystanders.  
24  
25

## 26 **Participants**

27  
28 Forty-four fire/transport teams consisting of 259 EMS professionals consented to participate and  
29  
30 completed simulations.  
31  
32

## 33 **Primary and Secondary Outcome Measures**

34  
35 We used a multivariable regression model to estimate the odds of error with increasing overall  
36  
37 CTS™ teamwork score while adjusting for clinical scenario and potential clustering by team.  
38  
39

## 40 **Results**

41  
42 Across 176 simulations, the mean overall score on the CTS™ was 6.04 (SD = 2.10; range 1 =  
43  
44 poor to 10 = perfect) and was normally distributed. The distribution of scores was similar across  
45  
46 the four clinical scenarios. At least one error was observed in 82% of the simulations. In  
47  
48 simulations with at least one observed error, the mean CTS™ score was 5.76 (SD = 2.04)  
49  
50 compared with 7.16 (SD = 1.95) in scenarios with no observed error. Logistic regression analysis  
51  
52  
53  
54  
55  
56  
57  
58  
59  
60

1  
2  
3 accounting for clustering at the team-level revealed that the odds of an error decreased 28% with  
4  
5 each unit increase in CTS™ (Odds Ratio = 0.72, 95% Confidence Interval 0.59 – 0.88).  
6  
7

## 8 **Conclusions**

9  
10 This study found that overall teamwork among care delivery teams was strongly associated with  
11  
12 the risk of serious adverse events in caring for critically ill and injured children.  
13  
14  
15  
16  
17  
18  
19  
20  
21  
22  
23  
24  
25  
26  
27  
28  
29  
30  
31  
32  
33  
34  
35  
36  
37  
38  
39  
40  
41  
42  
43  
44  
45  
46  
47  
48  
49  
50  
51  
52  
53  
54  
55  
56  
57  
58  
59  
60

For peer review only

## STRENGTHS AND LIMITATIONS OF THIS STUDY

- This research provides some of the first data that quantifies the relationship between clinical teamwork and the likelihood of medical errors in a pediatric prehospital setting.
- These data suggest CTS™ may be a useful tool to measure the immediate impact of interventions on teamwork that matter to the reduction of errors.
- Simulations replicated pediatric emergencies known to be high risk for errors and were conducted using professional actors and high fidelity pediatric simulators in the field with clinical EMS teams assembled and responding as they normally would reflecting every day clinical care as closely as possible.
- The appraisal of errors and assignment of teamwork scores were performed by clinicians who were not involved in EMS but were humans using their best judgement, which is a method subject to bias
- It remains uncertain whether poorer teamwork is the cause of errors or if it is simply associated with other deficits in performance that may be contributing, however, this finding provides a tool that can be used to measure impact before and after interventions.

## INTRODUCTION

Medical errors, are estimated to be the third leading cause of death in the United States (US) and the 14<sup>th</sup> leading cause worldwide.[1-3] The total aggregated cost of adverse safety events and errors is estimated to amount to trillions of dollars each year. [3] Medicine is both an important and imperfect field, combining science with art and humans with technology. In 1999, the world became aware that patients not only die from disease and traumatic events, some also die or are injured unintentionally through the provision of clinical care.[4] The landmark Institute of Medicine report estimated that the number of people who die every year due to preventable medical errors in the US alone, is equivalent to 3 jumbo jet crashes every 2 days, or one patient every 15 minutes, with over 1 million estimated to be harmed. Studies of medical errors have generally focused on adults and inpatient settings.[5-7] However, medical errors are also an important source of harm for pediatric patients with estimates of 70,000 pediatric inpatients harmed per year by medical errors.[8, 9] A more recent report, emphasizes that the cost of medical errors is proportionately more devastating to countries of low economic status.[10] Even less is known about the epidemiology, etiology, and risk factors for preventable adverse events in the care of children in the Emergency Medical Services (EMS) system where children first receive care for emergencies outside of the hospital.

Good communication and teamwork are critical in avoiding medical errors and assuring the safety of patients.[3] The World Health Organization considers communication to be the leading cause of unintentional patient harm.[11] Past reviews have indicated that aspects of teamwork such as leadership, trust and communication are largely correlated with the clinical success of teams.[12-14] For example, a study evaluating teamwork in the Intensive Care Unit indicated

1  
2  
3 that 37% of teamwork failures were due to verbal communication errors between physicians and  
4 nurses.[15] There have been interventions to reduce medical errors such as implementing  
5  
6 computerized provider order-entry systems, limiting residents' work shifts to consecutive hours,  
7  
8 and implementing evidence-based care bundles. A large retrospective study from the US  
9  
10 Veterans Affairs Hospital found that inpatient surgical mortality was reduced 18% following team  
11  
12 training interventions.[16] However, lack of prospective and detailed evaluation of teamwork  
13  
14 elements and specific errors limit our understanding of the effectiveness of these practices.[17]  
15  
16  
17 The goal of this study was to examine the relationship between measured teamwork and adverse  
18  
19 safety events in the prehospital emergency care of children using high-fidelity simulation.  
20  
21  
22  
23  
24  
25

## 26 **METHODS**

27  
28 We followed STROBE guidance for reporting of observational studies.[18] The Oregon Health  
29  
30 & Science University Institutional Review Board (IRB00006942) approved the study and all  
31  
32 subjects signed both study and video consent prior to participation.  
33  
34  
35  
36  
37

### 38 **Study Participants**

39  
40 In total, 176 simulations were performed over a 6-month timeframe with 44 teams of emergency  
41  
42 medical services (EMS) providers recruited from public fire and private transport crews in three  
43  
44 large counties surrounding Portland, Oregon in the United States. Portland is the largest city in  
45  
46 Oregon and the three county area that participated in this study serves a population of 1.8  
47  
48 million. The EMS system in this region has dual-Advanced Life Support response to all 911  
49  
50 calls with public fire agencies, responding in teams of 3-5 individuals with at least one  
51  
52 paramedic, and a private transport agency, responding in 2-person teams with at least one  
53  
54  
55  
56  
57  
58  
59  
60

1  
2  
3 paramedic. We conducted all simulations *in situ* with both fire and transport EMS teams  
4  
5 responding to each scenario as they normally would when providing clinical care. Participants  
6  
7 ranged from Emergency Medical Technician (EMT) to paramedic, with each team including at  
8  
9 least one paramedic.  
10  
11  
12  
13

14  
15 Forty-four fire/transport teams consisting of 259 EMS professionals were available in the three-  
16  
17 county region during our study timeframe and consented to participate. All who consented  
18  
19 completed the study. One individual withdrew consent to have his/her individual data analyzed  
20  
21 after completing the simulation sessions for personal reasons, but agreed to analysis of team-  
22  
23 level data for all simulation sessions he/she had participated. In total, we analyzed team-level  
24  
25 data from 44 teams and individual-level data from 258 EMS professionals.  
26  
27  
28  
29

### 30 31 **Patient Involvement**

32  
33 The EMS-C Children's Safety Initiative is an observational study with a specific focus on EMS  
34  
35 providers. Patients were not involved in the design, recruitment, or conduct of the study.  
36  
37  
38  
39

### 40 41 **Simulations**

42  
43 Each fire/ambulance team participated in four simulation scenarios: (1) cardiac arrest in newborn  
44  
45 (Newborn Resuscitation Program, NRP), (2) cardiac arrest in child (Pediatric Advanced Life  
46  
47 Support PALS), (3) non-accidental trauma (NAT), and (4) accidental trauma from pedestrian-  
48  
49 motor vehicle collision (MVC). Simulations were conducted *in situ* using high-fidelity  
50  
51 simulators, scene design, and professional actors playing roles of parents and bystanders. EMS  
52  
53 crews responded in their agency vehicles after receiving a radio dispatch. Simulators included  
54  
55  
56  
57  
58  
59  
60



1  
2  
3 Victoria™ birthing patient simulator and the Newborn Hal™ simulator from Gaumard™, and  
4  
5 Sim Jr.™ 6-year-old child and sim NewB™ newborn simulators from Laerdal™. Settings  
6  
7 included street (motor vehicle collision or MVC), simulated apartment bedroom for birth  
8  
9 (neonatal resuscitation protocol or NRP), disheveled family room (neonatal abuse trauma or  
10  
11 NAT), simulated care facility for eight year old with cardiac arrest (pediatric advanced life  
12  
13 support or PALS) and all simulations were allowed to continue through transport in the agency's  
14  
15 own ambulances.  
16  
17  
18  
19  
20

21  
22 In the NRP scenario, the patient presented as a newborn who was initially responsive upon  
23  
24 delivery but subsequently developed a weak cry, flaccid extremities, bradycardia, and cyanosis  
25  
26 requiring resuscitation. For the PALS case, the patient presented as a six-year-old boy with  
27  
28 symptomatic bradycardia that progressed to pulseless electrical activity with a reported history of  
29  
30 developmental disabilities, seizures, and cerebral palsy, living in a care facility. In the NAT case,  
31  
32 a six-month-old patient had “fallen” from the couch and was unconscious and unresponsive with  
33  
34 bruising consistent with inflicted injury. In the MVC scenario, the patient was a three-month-old  
35  
36 child who, while in a stroller, was stuck by a car. The patient had a large scalp wound and was  
37  
38 initially crying but shortly after developed decreased responsiveness, hypertension, bradycardia,  
39  
40 and slow respirations. Makeup was used to simulate bruising, bleeding and lacerations in a  
41  
42 standardized manner for each scenario. Each scenario followed a previously determined  
43  
44 algorithm for improvement or decompensation of the patient's status along pre-specified time  
45  
46 intervals according to performance of specific critical actions also specified in advance. All  
47  
48 scenarios were pilot tested among EMS teams who did not subsequently participate in the study.  
49  
50  
51  
52  
53  
54  
55  
56  
57  
58  
59  
60

1  
2  
3 Scenarios were revised as needed based on feedback from pilot testing. Professionally trained  
4  
5 actors played all confederate roles in the scenarios to enhance realism.  
6  
7

8  
9  
10 For the purpose of standardization, simulation scenarios concluded after approximately 10  
11  
12 minutes. If the team initiated a procedure close to the 10-minute mark, such as calculating and  
13  
14 drawing up a medication, the simulation was allowed to continue to complete observation of the  
15  
16 task in process and reduce the chances of an awkward end to the scenario. If the care protocols  
17  
18 proceeded rapidly, and the condition of the patient was stable and transport action had begun, the  
19  
20 simulation could be concluded before the 10-minute point. After finishing all four scenarios,  
21  
22 teams returned for a 30-minute debriefing session.  
23  
24  
25

26  
27  
28 Simulation scenarios were presented to teams in random order to minimize the potential bias that  
29  
30 may occur from conditioning as teams become familiar with the simulators and working with  
31  
32 each other. Fire and transport crews responded to each scenario in their own fire engines and  
33  
34 ambulances after receiving a scripted radio dispatch. Each crew used their own equipment or  
35  
36 alternatively used training kits that were replicas of the kits they usually carry. The crews varied  
37  
38 who arrived on scene first (ambulance or fire department) and at times arrived simultaneously to  
39  
40 mimic local practice. Crews were able to move the patient simulators to the transport vehicle and  
41  
42 mimic patient transport to the hospital. If transport was started, the crews would assign a driver  
43  
44 and those who remained inside the transport vehicle would continue to administer patient care.  
45  
46  
47 All crews were aware they were participating in simulated emergencies and were oriented to the  
48  
49 study and mannequins prior to participation. To allow for anonymous tracking of each  
50  
51 participant by role, the crew members wore colored tape markers on their shoulders. The fire  
52  
53  
54  
55  
56  
57  
58  
59  
60

1  
2  
3 crews also varied the person-in-charge (PIC) assignment for each scenario, although the crew  
4  
5 membership was consistent.  
6  
7  
8  
9

## 10 **Data Collection**

11  
12 Prior to simulations, participants completed a survey asking about demographic characteristics,  
13  
14 training and their experience in Emergency Medical Services.  
15  
16  
17  
18

19 One of two subject matter experts (JMG & MH) experienced in using the Clinical Teamwork  
20  
21 Scale (CTS™) directly observed simulations in real time and measured teamwork using the  
22  
23 CTS™, a validated instrument that measures overall teamwork and 15 specific elements in 5  
24  
25 overarching domains in addition to overall teamwork: communication, decision making, role  
26  
27 responsibility (leadership and followership), situational awareness/resource management and  
28  
29 patient-friendliness.[19] Evaluators rate the performance of the care team using a Likert scale of  
30  
31 zero (unacceptable) to 10 (perfect) and are given space to insert narrative comments. In  
32  
33 validation studies, the CTS™ has demonstrated substantial score concordance among raters, and  
34  
35 excellent interrater reliability.[20-22] A systematic review of tools that have been used to  
36  
37 measure teamwork recently concluded that CTS™ was superior to other tools for measuring  
38  
39 teamwork citing content and construct validity as well as reliability and ease of use.[23] Prior to  
40  
41 the study, simulations were pilot tested with EMS teams not involved in the study. During this  
42  
43 time, both reviewers scored teamwork independently using CTS™ arrived at consensus and  
44  
45 repeated independent assessments of new simulations to arrive at consistency. Reviewers  
46  
47 checked in throughout the study to maintain consistency in scoring.  
48  
49  
50  
51  
52  
53  
54  
55  
56  
57  
58  
59  
60

## Error Measurement

During the simulations, the evaluators noted the number of errors and described what the error entailed using standard taxonomy. For purposes of this study, errors were collapsed into whether an error was present or not present. When there was uncertainty over whether an action may or may not have constituted an error, the team discussed to reach consensus.

## Statistical analysis

We summarized error proportion by each simulated clinical scenario, and summarized teamwork (CTS™ teamwork score) by the presence or absence of an error. We summarized teamwork as the overall CTS™ score and also by each score in the five sub-domains of the CTS™. Scores were compared between groups using t tests for unequal variances. A generalized estimate equation (GEE) logistic regression model was used to estimate the odds of error with increasing CTS™ score and tested for confounding by scenario and years of EMS experience. Teams completed four different simulations yielding correlated data that was accounted for in the GEE model using an exchangeable correlation structure clustering by team. Completed case analysis was used and a *p*-value of <0.05 was considered statistically significant. All analyses were performed using SAS (version 9.4 SAS Institute Inc., Carey, NC)

## RESULTS

Table 1 shows demographic characteristics and self-reported professional experience of EMS responders participating in the simulation sessions.

**Table 1: Characteristics of EMS Personnel Participating in Simulations**

| Characteristic                                                                       | N (%) |        |
|--------------------------------------------------------------------------------------|-------|--------|
| Mean Age years (S.D) <sup>a</sup>                                                    | 36.9  | (8.47) |
| Gender <sup>b</sup>                                                                  |       |        |
| Female                                                                               | 36    | (14.0) |
| Race/Ethnicity <sup>c</sup>                                                          |       |        |
| White                                                                                | 220   | (89.1) |
| Black or African American                                                            | 0     | (0)    |
| American Indian or Alaska Native                                                     | 6     | (2.43) |
| Asian                                                                                | 4     | (1.62) |
| Native Hawaiian or Other Pacific Islander                                            | 2     | (0.81) |
| Hispanic or Latino                                                                   | 7     | (2.83) |
| Other/Two or More Races                                                              | 8     | (3.24) |
| Training Level <sup>b</sup>                                                          |       |        |
| Emergency Medical Responder (EMR)                                                    | 0     | (0)    |
| Emergency Medical Technician (EMT)                                                   | 100   | (38.9) |
| Advanced EMT                                                                         | 2     | (0.78) |
| EMT-Intermediate                                                                     | 25    | (9.73) |
| Paramedic                                                                            | 128   | (49.8) |
| Paramedic Intern                                                                     | 2     | (0.78) |
| Years' Experience Working in EMS <sup>d</sup>                                        | 11.7  | (7.84) |
| Proficiency in Pediatric EMS on a Scale of 1 ("Novice") to 5 ("Expert") <sup>b</sup> | 2.55  | (0.89) |

a) n = 256, b) EMS n = 257, c) n = 247, d) n = 258

At least one error was observed in 82% of the 176 simulation scenarios for which the presence or absence of errors was recorded. Due to missing data for overall CTS™ score, data for six scenarios were not included in the logistic regression analysis. Table 2 describes the types of errors observed.

**Table 2: Taxonomy of Observed Errors**

| <b>Errors</b>                             | <b>Type</b>                                                                 |
|-------------------------------------------|-----------------------------------------------------------------------------|
| <b><i>Diagnostic &amp; Management</i></b> | Assessment, algorithm, diagnostic, management, decision making              |
| <b><i>Medication</i></b>                  | Wrong medication, dose, route, sequence, type, IV fluid issue, etc.         |
| <b><i>Technical</i></b>                   | Wrong device, size, bagging, intubation, CPR, defibrillator, immobilization |
| <b><i>Scene/Environment</i></b>           | Scene safety, scene time, positioning, patient/family                       |

The overall CTS™ score was normally distributed, with a mean of 6.04 (SD = 2.10; min = 1 (poor) and max = 10 (perfect)) in the 170 simulations with recorded overall CTS™ scores. The distributions of overall CTS™ scores were similar across the four scenarios. In simulations with an overall CTS™ score and at least one observed error (n = 138), the mean CTS™ score was 5.76 (SD = 2.04) compared with 7.16 (SD = 1.95) in scenarios with no observed error (n = 32). The t tests demonstrated that this difference was statistically significant (p-value = 0.0007). For each individual simulation scenario, teams with no errors had higher CTS™ scores than teams with one or more errors. There were statistically significant differences in CTS™ scores between teams with no errors and teams with errors in the Non-Accidental Trauma simulation and the Newborn Cardiac Arrest simulation, with the no error teams having significantly greater CTS™

1  
2  
3 scores. Table 3 provides comparative data for CTS™ scores between teams with and without  
4  
5 errors by simulation scenario.  
6  
7

8  
9 **Table 3: Comparing CTS™ Overall Teamwork Score Between Teams With  
and Without Errors by Simulation Scenario**

| Simulation Scenario         | One or     |             | t <sup>+</sup> | P value |
|-----------------------------|------------|-------------|----------------|---------|
|                             | No Error   | More Errors |                |         |
|                             | (mean, SD) | (mean, SD)  |                |         |
| Motor Vehicle Collision     | 6.20(2.25) | 5.91(1.96)  | 0.37           | 0.72    |
| Non-Accidental Trauma       | 8.20(1.10) | 5.57(2.03)  | 4.39           | *0.0019 |
| Newborn Cardiac Arrest      | 7.55(1.97) | 5.79(2.18)  | 2.5            | *0.022  |
| Six-Year-Old Cardiac Arrest | 7.17(1.60) | 5.78(2.09)  | 1.88           | 0.097   |
| All Simulations             | 7.16(1.95) | 5.76(2.04)  | 3.61           | *0.0007 |

21 †Satterhwaite t-test for unequal variances

22 \*significant at alpha=0.05  
23  
24  
25

26 After comparing an unadjusted GEE logistic regression model to a model controlling for  
27 scenario and mean years of EMS experience, there were no significant differences in the effect  
28 estimate for CTS™ score or significance of estimates (Table 4). This indicates that the  
29 relationship between overall CTS™ and odds of error was not confounded by scenario or years  
30 of EMS experience; thus, the final model reported is unadjusted for these variables. Logistic  
31 regression analysis accounting for clustering at the team-level revealed that the odds of an error  
32 decreased 28% with each unit increase in CTS™ (Odds Ratio = 0.72, 95% Confidence Interval  
33 0.59 – 0.88).  
34  
35  
36  
37  
38  
39  
40  
41  
42  
43  
44

45 **Table 4. GEE Logistic Regression Models Testing Associations between Teamwork and Errors**

| Predictor Variable          | Unadjusted |             |      |         | Adjusted <sup>†</sup> |              |       |         |
|-----------------------------|------------|-------------|------|---------|-----------------------|--------------|-------|---------|
|                             | OR         | 95% CI      | Z    | p-value | OR                    | 95% CI       | Z     | p-value |
| CTS Score (1-unit increase) | 0.72       | (0.59,0.88) | -3.2 | 0.0014  | 0.73                  | (0.59,0.89)  | -3.06 | 0.0022  |
| MVC                         | -          | -           | -    | -       | 0.45                  | (0.18,1.17)  | -1.63 | 0.1034  |
| NRP                         | -          | -           | -    | -       | 0.46                  | (0.20,1.04)  | -1.87 | 0.0618  |
| PALS                        | -          | -           | -    | -       | 0.88                  | (0.25,3.03)  | -0.21 | 0.8352  |
| NAT                         | -          | -           | -    | -       | REF                   | -            | -     | -       |
| Mean Years EMS Experience   | -          | -           | -    | -       | 0.92                  | (0.79, 1.07) | -1.07 | 0.284   |

<sup>+</sup>Adjusted for clinical scenario (NAT = reference group) and mean years of EMS experience at the team level

Within the simulations, the percentage of teams that completed a simulation without error was highest in the Newborn Cardiac Arrest simulation (25%). The simulation with the highest percentage of teams with one or more error was the Non-Accidental Trauma simulation, with 89% of simulation having at least one error. Bivariable analysis suggested that adverse safety events are more likely in teams with low teamwork scores.

Adverse safety events were also more likely in teams with lower individual scores in communication, situational awareness, decision-making, and leadership/followership (Table 5).

**Table 5: CTS™ Domain-specific Ratings in Simulations with and without Any Observed Error**

| Error<br><i>CTS™ Item</i>                                   | CTS™ Item Rating               |                                          |                |
|-------------------------------------------------------------|--------------------------------|------------------------------------------|----------------|
|                                                             | <i>No Error<br/>(mean, SD)</i> | <i>One or More Errors<br/>(mean, SD)</i> | <i>P Value</i> |
| Overall Communication <sup>a</sup>                          | 7.13 (2.21)                    | 5.89 (2.00)                              | 0.002          |
| Overall Situational Awareness <sup>b</sup>                  | 7.31 (2.07)                    | 6.26 (2.25)                              | 0.01           |
| Overall Decision Making <sup>c</sup>                        | 7.26 (2.07)                    | 5.49 (2.35)                              | <0.001         |
| Overall Role Responsibility<br>(Leader/Helper) <sup>d</sup> | 7.25 (1.74)                    | 6.06 (1.92)                              | 0.001          |
| Patient Friendliness <sup>d</sup>                           | 7.13 (2.56)                    | 6.44 (2.17)                              | 0.16           |

a) n = 160, b) n = 170, c) n = 167, d) n = 163

Compared with teams with one or more errors, teams without any errors had higher CTS™ scores across all itemized categories of the CTS™ (Overall Communication, Overall Situational Awareness, Overall Decision making, Overall Role Responsibility, and Patient Friendliness).

Among these categories, teams with no error had significantly higher CTS™ scores for Overall



1  
2  
3 Communication, Overall Situational Awareness, Overall Decision Making, and Overall Role  
4  
5 Responsibility (Leadership/Helper).  
6  
7  
8  
9

## 10 **DISCUSSION**

11  
12 In this study of simulated pediatric prehospital emergencies, we observed a higher frequency of  
13 errors in teams with lower-rated teamwork scores. This finding was observed consistently across  
14 a variety of clinical scenarios (e.g., both newborn cardiac arrest and non-accidental trauma) and  
15 teamwork sub-domains (e.g., communication and situational awareness). Our study builds on the  
16 prior research on the role of teamwork in medical errors, which has mostly been conducted in the  
17 hospital setting.[24, 25] Using high-fidelity simulation scenarios and a validated teamwork  
18 measurement tool, we extended this research to the pediatric prehospital emergency care setting,  
19 and found an association between teamwork and medical errors.  
20  
21  
22  
23  
24  
25  
26  
27  
28  
29  
30  
31  
32

33 The results were robust to multivariable regression adjustment, suggesting that breakdowns in  
34 teamwork are indeed a factor contributing to the high error rates observed in this study. These  
35 findings add strength to the WHO's description of communication as a leading cause of  
36 unintentional harm and further elaborate on the importance of teamwork in decreasing  
37 errors.[11] Additionally, These findings provide a nice complement to the work on surgical  
38 mortality and team training[16] as this provides a mechanism to measure the immediate  
39 intervening factors that are likely in the causal pathway.  
40  
41  
42  
43  
44  
45  
46  
47  
48  
49  
50

51 Given the large cost and morbidity burden associated with medical errors worldwide, these  
52 findings suggest directions for future research and also have policy implications.[3, 10] Most  
53  
54  
55  
56  
57  
58  
59  
60

1  
2  
3 immediately, however, more studies are needed to confirm this association both in this specific  
4 healthcare setting as well as other clinical areas where team-based care is the norm. For example,  
5  
6 future studies should examine the contribution of teamwork to medical errors in hospital  
7  
8 emergency medical care to continue building our understanding of the role of teamwork beyond  
9  
10 the ICU. This direction of research is important internationally, and may be particularly critical  
11  
12 for countries of low economic means, who are impacted heavily by the financial burdens. [10]  
13  
14  
15  
16  
17  
18

19 We used a validated measure of teamwork, the CTST<sup>TM</sup>. CTST<sup>TM</sup> has been used around the world  
20  
21 in different settings and clinical care areas. [20-22] Future studies should utilize this measure  
22  
23 and also continue to refine methods for measuring the multi-modal concept of teamwork in  
24  
25 health care systems around the world. Given the complexity of teamwork and the inherent  
26  
27 challenges in measuring it (e.g., different evaluations based on different parties, the limitations of  
28  
29 self-reported/self-scored data, etc.), additional research will be needed to provide a full picture of  
30  
31 the role of teamwork in patient outcomes. In clinical settings where our findings are replicated, it  
32  
33 will be essential to consider interventions, training, and policies to prevent teamwork-associated  
34  
35 medical errors.  
36  
37  
38  
39  
40  
41

42 There are several important limitations to consider. We conducted simulations and measured  
43  
44 teamwork in one geographic region with a specific EMS system design which may not be  
45  
46 representative of other areas. Although we employed best-practices in conducting our  
47  
48 simulations and measuring teamwork (e.g., cutting-edge simulation models, the use of trained  
49  
50 actors, a validated teamwork measurement scale), our study examined simulated healthcare  
51  
52 encounters, rather than actual healthcare. However, due to the rare nature of critical pediatric  
53  
54  
55  
56  
57  
58  
59  
60

1  
2  
3 emergencies in EMS, direct observation of care is not feasible on this scale. Next, we do not  
4  
5 know if poorer teamwork is the cause of errors or if it is simply associated with other deficits in  
6  
7 performance that may be contributing, such as medical knowledge. Further, the appraisal of  
8  
9 errors and assignment of teamwork scores were performed by humans using their best  
10  
11 judgement, which is a method subject to bias. Finally, while the amount of missing data were  
12  
13 small, we dealt with missing data using complete-case analysis. The analytic approach to missing  
14  
15 data continues to be a subject of active investigation with recent writings suggesting that the best  
16  
17 approach is to think through the likely causes of bias and select the analytic method that is least  
18  
19 likely to introduce bias and best able to reduce bias.[26] Although several options are available  
20  
21 for addressing missingness (e.g., multiple imputation approaches), several features of our  
22  
23 specific data raised questions about the applicability of these approaches in our study. Our data  
24  
25 structure includes nested, non-independent observations, where the same clinical team  
26  
27 participated in clinically distinct simulations and different clinical teams participated in each  
28  
29 clinical simulation. Given this, it did not seem appropriate to impute scores from other clinical  
30  
31 teams in the same clinical scenario to the team with missing data, as this would assume that the  
32  
33 clinical performance of teams was homogeneous. In the same note, it did not seem appropriate to  
34  
35 assume that one clinical team would perform similarly on clinical cases that were very distinct.  
36  
37 Given that neither of these assumptions seemed appropriate and also that our total number of  
38  
39 missing data was small, the most honest interpretation of our data seemed to be complete case  
40  
41 analysis. In conclusion, we found that teamwork is highly correlated with errors in simulated  
42  
43 pediatric prehospital emergencies and this finding was robust across four different simulation  
44  
45 scenarios as well as across sub-domains of teamwork.  
46  
47  
48  
49  
50  
51  
52  
53  
54  
55  
56  
57  
58  
59  
60

1  
2  
3  
4  
5  
6  
7  
8  
9  
10  
11  
12  
13  
14  
15  
16  
17  
18  
19  
20  
21  
22  
23  
24  
25  
26  
27  
28  
29  
30  
31  
32  
33  
34  
35  
36  
37  
38  
39  
40  
41  
42  
43  
44  
45  
46  
47  
48  
49  
50  
51  
52  
53  
54  
55  
56  
57  
58  
59  
60

**CONCLUSION**

Overall teamwork is strongly associated with the risk of adverse events in critically ill and injured children.

For peer review only

## DECLARATIONS

### Acknowledgements

None

### Ethics approval and consent to participate

The study was approved by Oregon Health & Science University's Institutional Review Board, IRB Approval# 00006942.

### Competing interests

The authors have no conflict of interest to report.

### Funding

This work was supported by the National Institute of Child Health and Human Development, Grant No. 1R01HD062478.

**Data Sharing:** Aggregated data specific to this publication would be made available upon request.

**Author Contributions:** All authors contributed significantly to this work. SH is first author. JMG and WL obtained funding. SH, MH, BS, JS, JM, WL, and JMG conceived and designed the study. SH, MH, BS, JM, TH, WL, and JMG performed the simulations and participated in acquisition of data. SH, BS, AS, JS, WL, and JMG analyzed the data. SH, BS, JS, WL, and JMG wrote the first draft of the paper. SH, AS, WL, JS, and JMG conducted additional analyses and made revisions to the paper from peer review. All authors have read, edited, and approved the final manuscript and are able to accept responsibility for the work.

**REFERENCES CITED**

1. Quality Interagency Coordination Task Force. Doing what counts for patient safety: Federal actions to reduce medical errors and their impact Rockville, MD: Agency for Healthcare and Research Quality; [cited 2017 May 12]. Available from: <https://archive.ahrq.gov/quic/report/mederr4.htm>
2. Makary M, Daniel M. Medical error-the third leading cause of death in the US. *BMJ*. 2016;353:i2139.
3. Slawomirski L, Auraaen A, Klazinga N. The economics of patient safety: Strengthening a value-based approach to reducing patient harm at national level. Paris, France: Organisation for Economic Co-operation and Development, 2017.
4. Committee on Quality of Health Care in America. To err is human: Building a safer health system. Institute of Medicine, editor. Washington, DC: National Academy Press; 1999.
5. Aranaz-Andres J, Aibar-Remon C, Vitaller-Burillo J, Requena-Puche J, Terol-Garcia E, Kelley E, et al. Impact and preventability of adverse events in Spanish public hospitals: results of the Spanish National Study of Adverse Events (ENEAS). *Int J Qual Health Care*. 2009;21(6):408-14.
6. Westbrook J, Li L, Lehnbohm E, Baysari MT, Braithwaite J, Burke R, et al. What are incident reports telling us? A comparative study at two Australian hospitals of medication errors identified at audit, detected by staff and reported to an incident system. *Int J Qual Health Care*. 2015;27(1):1-9.

- 1  
2  
3 7. Giraldo P, Sato L, Sala M, Comas M, Dywer K, Castells X. A retrospective review of  
4 medical errors adjudicated in court between 2002 and 2012 in Spain. *Int J Qual Health*  
5 *Care*. 2016;28(1):33-9.  
6  
7
- 8 8. Kaushal R, Bates D, Landrigan C. Medication errors and adverse drug events in pediatric  
9 inpatients. *JAMA*. 2001;285(16):2114-20.  
10  
11
- 12 9. Woods D, Thomas E, Holl J, al. e. Adverse events and preventable adverse events in  
13 children. *Pediatrics*. 2005;115(1):155-60.  
14  
15
- 16 10. National Academies of Sciences, Engineering and Medicine. *Crossing the Global Quality*  
17 *Chasm: Improving Health Care Worldwide*. Washington, DC: 2018.  
18  
19
- 20 11. Katzenbach J, Smith D. *The discipline of teams*. Boston, MA: Harvard Business Press;  
21 2008.  
22  
23
- 24 12. Baker D, Gustafson S, Beaubien J, al. e. *Medical teamwork and patient safety: The*  
25 *evidence-based relation*. Rockville, MD: Agency for Healthcare and Research Quality,  
26 2005.  
27  
28
- 29 13. Manser T. *Teamwork and patient safety in dynamic domains of healthcare: A review of*  
30 *the literature*. *Acta Anaesthesiol Scand*. 2009;53(2):143-51.  
31  
32
- 33 14. Sorbero M, Farley D, Mattke S, al. e. *Outcomes measures for effective teamwork in*  
34 *inpatient care*. Santa Monica, CA: RAND Corporation, 2008.  
35  
36
- 37 15. Donchin Y, Gopher D, Olin M, al. e. A look into the nature and causes of human errors in  
38 the intensive care unit. *Crit Care Med*. 1995;23(2):294-300.  
39  
40
- 41 16. Neily J, Mills P, Young-Xu Y, Carney B, West P, Berger D, et al. Association between  
42 implementation of a medical team training program and surgical mortality. *JAMA*.  
43 2010;304(15):1693-700.  
44  
45  
46  
47  
48  
49  
50  
51  
52  
53  
54  
55  
56  
57  
58  
59  
60

- 1  
2  
3 17. Landrigan C. Resident sleep deprivation and critical care: the unintended consequences  
4 of inaction. *Crit Care Med*. 2010;38(3):980-1.  
5  
6
- 7  
8 18. von Elm E, Altman D, Egger M, Pocock S, Gøtzsche P, Vandenbroucke J. The  
9  
10 Strengthening the Reporting of Observational Studies in Epidemiology (STROBE)  
11 statement: guidelines for reporting observational studies. *PLoS Med*. 2007;4(10):e296.  
12  
13
- 14  
15 19. Guise J, Deering S, Kanki B, al. e. Validation of a tool to measure and promote clinical  
16 teamwork. *Simul Healthc*. 2008;3(4):217-23.  
17  
18
- 19  
20 20. Fransen A, van de Ven J, Merien A, de Wit-Zuurendonk L, Houterman S, Mol B, et al.  
21 Effect of obstetric team training on team performance and medical technical skills: a  
22 randomised controlled trial. *BJOG*. 2012;119(11):1387-93.  
23  
24
- 25  
26 21. Miller D, Crandall C, Washington C, 3rd, McLaughlin S. Improving teamwork and  
27 communication in trauma care through in situ simulations. *Acad Emerg Med*.  
28  
29 2012;19(5):608-12.  
30  
31
- 32  
33 22. Banga F, Truijens S, Fransen A, Dieleman J, van Runnard Heimeel P, Oei G. The impact  
34 of transmural multiprofessional simulation-based obstetric team training on perinatal  
35 outcome and quality of care in the Netherlands. *BMC Med Educ*. 2014;14:175.  
36  
37
- 38  
39 23. Fransen A, de Boer L, Kienhorst D, Truijens S, van Runnard Heimeel P, Oei S. Assessing  
40 teamwork performance in obstetrics: A systematic search and review of validated tools.  
41  
42 *Eur J Obstet Gyn Reprod Biol*. 2017;216:184-91.  
43  
44
- 45  
46 24. van de Ven J, Houterman S, Steinweg R, Scherpier A, Wijers W, Mol B, et al. Reducing  
47 errors in health care: cost-effectiveness of multidisciplinary team training in obstetric  
48 emergencies (TOSTI study); a randomised controlled trial. *BMC Preg Childbirth*.  
49  
50 2010;10:59.  
51  
52  
53  
54  
55  
56  
57  
58  
59  
60



- 1  
2  
3 25. McCulloch P, Mishra A, Handa A, Dale T, Hirst G, Catchpole K. The effects of aviation-  
4 style non-technical skills training on technical performance and outcome in the operating  
5 theatre. *Qual Saf Health Care*. 2009;18(2):109-15.  
6  
7  
8  
9  
10 26. Hernán M, Robins J. Per-protocol analyses of pragmatic trials. *N Engl J Med*.  
11  
12 2017;377(14):1391-8.  
13  
14  
15  
16  
17  
18  
19  
20  
21  
22  
23  
24  
25  
26  
27  
28  
29  
30  
31  
32  
33  
34  
35  
36  
37  
38  
39  
40  
41  
42  
43  
44  
45  
46  
47  
48  
49  
50  
51  
52  
53  
54  
55  
56  
57  
58  
59  
60

For peer review only

## STROBE Statement—checklist of items that should be included in reports of observational studies

|                              | Item No | Recommendation                                                                                                                                                                             | Page #   |
|------------------------------|---------|--------------------------------------------------------------------------------------------------------------------------------------------------------------------------------------------|----------|
| <b>Title and abstract</b>    | 1       | (a) Indicate the study's design with a commonly used term in the title or the abstract                                                                                                     | 1        |
|                              |         | (b) Provide in the abstract an informative and balanced summary of what was done and what was found                                                                                        | 2        |
| <b>Introduction</b>          |         |                                                                                                                                                                                            |          |
| Background/rationale         | 2       | Explain the scientific background and rationale for the investigation being reported                                                                                                       | 4-5      |
| Objectives                   | 3       | State specific objectives, including any prespecified hypotheses                                                                                                                           | 5        |
| <b>Methods</b>               |         |                                                                                                                                                                                            |          |
| Study design                 | 4       | Present key elements of study design early in the paper                                                                                                                                    | 5-6      |
| Setting                      | 5       | Describe the setting, locations, and relevant dates, including periods of recruitment, exposure, follow-up, and data collection                                                            | 6        |
| Participants                 | 6       | (a) <i>Cohort study</i> —Give the eligibility criteria, and the sources and methods of selection of participants. Describe methods of follow-up                                            | 6        |
|                              |         | <i>Case-control study</i> —Give the eligibility criteria, and the sources and methods of case ascertainment and control selection. Give the rationale for the choice of cases and controls |          |
|                              |         | <i>Cross-sectional study</i> —Give the eligibility criteria, and the sources and methods of selection of participants                                                                      |          |
|                              |         | (b) <i>Cohort study</i> —For matched studies, give matching criteria and number of exposed and unexposed                                                                                   | NA       |
|                              |         | <i>Case-control study</i> —For matched studies, give matching criteria and the number of controls per case                                                                                 |          |
| Variables                    | 7       | Clearly define all outcomes, exposures, predictors, potential confounders, and effect modifiers. Give diagnostic criteria, if applicable                                                   | 7-10     |
| Data sources/<br>measurement | 8*      | For each variable of interest, give sources of data and details of methods of assessment (measurement). Describe comparability of assessment methods if there is more than one group       | 9        |
| Bias                         | 9       | Describe any efforts to address potential sources of bias                                                                                                                                  | 8-9      |
| Study size                   | 10      | Explain how the study size was arrived at                                                                                                                                                  | 6-7      |
| Quantitative variables       | 11      | Explain how quantitative variables were handled in the analyses. If applicable, describe which groupings were chosen and why                                                               | 10-11    |
| Statistical methods          | 12      | (a) Describe all statistical methods, including those used to control for confounding                                                                                                      | 10-11    |
|                              |         | (b) Describe any methods used to examine subgroups and interactions                                                                                                                        | 10-11    |
|                              |         | (c) Explain how missing data were addressed                                                                                                                                                | 10,11,16 |
|                              |         | (d) <i>Cohort study</i> —If applicable, explain how loss to follow-up was addressed                                                                                                        | NA       |
|                              |         | <i>Case-control study</i> —If applicable, explain how matching of cases and controls was addressed                                                                                         |          |
|                              |         | <i>Cross-sectional study</i> —If applicable, describe analytical methods taking account of sampling strategy                                                                               |          |
|                              |         | (e) Describe any sensitivity analyses                                                                                                                                                      | NA       |

Continued on next page

| <b>Results</b>           |     |                                                                                                                                                                                                              | <b>Page<br/>#</b> |
|--------------------------|-----|--------------------------------------------------------------------------------------------------------------------------------------------------------------------------------------------------------------|-------------------|
| Participants             | 13* | (a) Report numbers of individuals at each stage of study—eg numbers potentially eligible, examined for eligibility, confirmed eligible, included in the study, completing follow-up, and analysed            | 7                 |
|                          |     | (b) Give reasons for non-participation at each stage                                                                                                                                                         | 7                 |
|                          |     | (c) Consider use of a flow diagram                                                                                                                                                                           | NA                |
| Descriptive data         | 14* | (a) Give characteristics of study participants (eg demographic, clinical, social) and information on exposures and potential confounders                                                                     | 7,11,<br>12       |
|                          |     | (b) Indicate number of participants with missing data for each variable of interest                                                                                                                          | 12                |
|                          |     | (c) <i>Cohort study</i> —Summarise follow-up time (eg, average and total amount)                                                                                                                             | (NA)              |
| Outcome data             | 15* | <i>Cohort study</i> —Report numbers of outcome events or summary measures over time                                                                                                                          | (12-<br>15)       |
|                          |     | <i>Case-control study</i> —Report numbers in each exposure category, or summary measures of exposure                                                                                                         | NA                |
|                          |     | <i>Cross-sectional study</i> —Report numbers of outcome events or summary measures                                                                                                                           | NA                |
| Main results             | 16  | (a) Give unadjusted estimates and, if applicable, confounder-adjusted estimates and their precision (eg, 95% confidence interval). Make clear which confounders were adjusted for and why they were included | (12-<br>15)       |
|                          |     | (b) Report category boundaries when continuous variables were categorized                                                                                                                                    | (12-<br>15)       |
|                          |     | (c) If relevant, consider translating estimates of relative risk into absolute risk for a meaningful time period                                                                                             | NA                |
| Other analyses           | 17  | Report other analyses done—eg analyses of subgroups and interactions, and sensitivity analyses                                                                                                               | NA                |
| <b>Discussion</b>        |     |                                                                                                                                                                                                              |                   |
| Key results              | 18  | Summarise key results with reference to study objectives                                                                                                                                                     | 14-<br>15         |
| Limitations              | 19  | Discuss limitations of the study, taking into account sources of potential bias or imprecision. Discuss both direction and magnitude of any potential bias                                                   | 16                |
| Interpretation           | 20  | Give a cautious overall interpretation of results considering objectives, limitations, multiplicity of analyses, results from similar studies, and other relevant evidence                                   | 17                |
| Generalisability         | 21  | Discuss the generalisability (external validity) of the study results                                                                                                                                        | 15-<br>16         |
| <b>Other information</b> |     |                                                                                                                                                                                                              |                   |
| Funding                  | 22  | Give the source of funding and the role of the funders for the present study and, if applicable, for the original study on which the present article is based                                                | 18                |

\*Give information separately for cases and controls in case-control studies and, if applicable, for exposed and unexposed groups in cohort and cross-sectional studies.

# BMJ Open

## Association between Measured Teamwork and Medical Errors: An Observational Study of Prehospital Care in the United States

|                                 |                                                                                                                                                                                                                                                                                                                                                                                                                                                                                                                                                                                                                                                                                                                                                                                                                                              |
|---------------------------------|----------------------------------------------------------------------------------------------------------------------------------------------------------------------------------------------------------------------------------------------------------------------------------------------------------------------------------------------------------------------------------------------------------------------------------------------------------------------------------------------------------------------------------------------------------------------------------------------------------------------------------------------------------------------------------------------------------------------------------------------------------------------------------------------------------------------------------------------|
| Journal:                        | <i>BMJ Open</i>                                                                                                                                                                                                                                                                                                                                                                                                                                                                                                                                                                                                                                                                                                                                                                                                                              |
| Manuscript ID                   | bmjopen-2018-025314.R2                                                                                                                                                                                                                                                                                                                                                                                                                                                                                                                                                                                                                                                                                                                                                                                                                       |
| Article Type:                   | Original research                                                                                                                                                                                                                                                                                                                                                                                                                                                                                                                                                                                                                                                                                                                                                                                                                            |
| Date Submitted by the Author:   | 30-Aug-2019                                                                                                                                                                                                                                                                                                                                                                                                                                                                                                                                                                                                                                                                                                                                                                                                                                  |
| Complete List of Authors:       | Herzberg, Simone; Vanderbilt University Medical Center, Medical Scientist Training Program<br>Hansen, Matt; Oregon Health and Science University, Emergency Medicine<br>Schoonover, Amanda; Oregon Health and Science University, Obstetrics and Gynecology<br>Skarica, Barbara; Oregon Health and Science University, Obstetrics and Gynecology<br>McNulty, James; Oregon Health and Science University, Office of Simulation<br>Harrod, Tabria; Oregon Health and Science University, Obstetrics and Gynecology<br>Snowden, Jonathan M.; Oregon Health & Science University, Dept of Obstetrics & Gynecology/Public Health & Preventive Medicine<br>Lambert, William; Oregon Health and Science University, Public Health & Preventative Medicine<br>Guise, Jeanne-Marie ; Oregon Health and Science University, Obstetrics and Gynecology |
| <b>Primary Subject Heading</b>: | Public health                                                                                                                                                                                                                                                                                                                                                                                                                                                                                                                                                                                                                                                                                                                                                                                                                                |
| Secondary Subject Heading:      | Emergency medicine, Health services research, Paediatrics                                                                                                                                                                                                                                                                                                                                                                                                                                                                                                                                                                                                                                                                                                                                                                                    |
| Keywords:                       | Patient Safety, Medical Errors, Patient Care Team, Emergency Medical Services, Teamwork, Pediatric                                                                                                                                                                                                                                                                                                                                                                                                                                                                                                                                                                                                                                                                                                                                           |
|                                 |                                                                                                                                                                                                                                                                                                                                                                                                                                                                                                                                                                                                                                                                                                                                                                                                                                              |

SCHOLARONE™  
Manuscripts

# Association between Measured Teamwork and Medical Errors: An Observational Study of Prehospital Care in the United States

**Authors:** Simone Herzberg<sup>1,2</sup>, Matthew Hansen<sup>3</sup>, Amanda Schoonover<sup>2</sup>, Barbara Skarica<sup>2</sup>, James McNulty<sup>4</sup>, Tabria Harrod<sup>2</sup>, Jonathan M. Snowden<sup>2,5</sup>, William Lambert,<sup>5</sup> Jeanne-Marie Guise<sup>2,3,5,6</sup>

<sup>1</sup>*Vanderbilt School of Medicine, Nashville, TN USA*

<sup>2</sup>*Department of Obstetrics & Gynecology, Oregon Health & Science University School of Medicine, Portland, OR USA*

<sup>3</sup>*Department of Emergency Medicine, Oregon Health & Science University School of Medicine, Portland, OR USA*

<sup>4</sup>*Office of Simulation, Oregon Health & Science University, Portland, OR USA*

<sup>5</sup>*Oregon Health & Science University-Portland State University School of Public Health, Portland, OR USA*

<sup>6</sup>*Department of Medical Informatics & Clinical Epidemiology, Oregon Health & Science University School of Medicine, Portland, OR USA*

**Keywords:** Patient Safety; Medical Errors; Cooperative Behavior; Patient Care Team; Emergency Medical Services; Teamwork; Patient Simulation; Child; Humans

**Corresponding Author:** Jeanne-Marie Guise, M.D., M.P.H., Department of Obstetrics & Gynecology, OHSU, Mail Code: L466, 3181 SW Sam Jackson Park Road, Portland, OR 97239. Tel: (503) 494-2101; Fax: (503) 494-5296; Email: guisej@ohsu.edu

**Word Count:** 2,616 (excluding title page, abstract, references, tables and figures)

## ABSTRACT

### Objectives

1  
2  
3 The goal of this study was to examine the relationship between measured teamwork and adverse  
4 safety events in the prehospital emergency care of children using high-fidelity simulation. We  
5  
6 posit that non-technical skills such as leadership, teamwork, situation awareness and decision  
7  
8 making are associated with the clinical success of teams.  
9

## 12 **Design**

14  
15 Observational study.

## 17 **Setting**

18  
19 Emergency Medical Services (EMS) responders were recruited from public fire and private  
20  
21 transport agencies in Oregon State to participate in four simulations of pediatric emergencies  
22  
23 using high-fidelity patient simulators, scene design, and professional actors playing parents and  
24  
25 bystanders.  
26  
27

## 28 **Participants**

29  
30 Forty-four fire/transport teams consisting of 259 EMS professionals consented to participate and  
31  
32 completed simulations.  
33  
34

## 35 **Primary and Secondary Outcome Measures**

36  
37 Teams were assessed using the CTS™, a validated instrument that measures overall teamwork  
38  
39 and 15 specific elements in 5 overarching domains: communication, decision making, role  
40  
41 responsibility (leadership and followership), situational awareness/resource management and  
42  
43 patient-friendliness. We used generalized estimating equations to estimate the odds of error with  
44  
45 increasing overall CTS™ teamwork score while adjusting for clinical scenario and potential  
46  
47 clustering by team.  
48  
49

## 50 **Results**

1  
2  
3 Across 176 simulations, the mean overall score on the CTS™ was 6.04 (SD = 2.10; range 1 =  
4 poor to 10 = perfect) and was normally distributed. The distribution of scores was similar across  
5 the four clinical scenarios. At least one error was observed in 82% of the simulations. In  
6  
7 simulations with at least one observed error, the mean CTS™ score was 5.76 (SD = 2.04)  
8 compared with 7.16 (SD = 1.95) in scenarios with no observed error. Logistic regression analysis  
9  
10 accounting for clustering at the team-level revealed that the odds of an error decreased 28% with  
11  
12 each unit increase in CTS™ (Odds Ratio = 0.72, 95% Confidence Interval 0.59 – 0.88).  
13  
14  
15  
16  
17  
18

### 19 **Conclusions**

20  
21 This study found that overall teamwork among care delivery teams was strongly associated with  
22  
23 the risk of serious adverse events in simulated scenarios of caring for critically ill and injured  
24  
25 children.  
26  
27  
28  
29  
30  
31  
32  
33  
34  
35  
36  
37  
38  
39  
40  
41  
42  
43  
44  
45  
46  
47  
48  
49  
50  
51  
52  
53  
54  
55  
56  
57  
58  
59  
60

## STRENGTHS AND LIMITATIONS OF THIS STUDY

- This research provides some of the first data that quantifies the relationship between clinical teamwork and the likelihood of medical errors in a pediatric prehospital setting.
- These data suggest CTS™ may be a useful tool to measure the immediate impact of interventions on teamwork that matter to the reduction of errors.
- Simulations replicated pediatric emergencies known to be high risk for errors and were conducted using professional actors and high fidelity pediatric simulators in the field with clinical EMS teams assembled and responding as they normally would reflecting every day clinical care as closely as possible.
- The appraisal of errors and assignment of teamwork scores were performed by clinicians who were not involved in EMS but were humans using their best judgement, which is a method subject to bias
- It remains uncertain whether poorer teamwork is the cause of errors or if it is simply associated with other deficits in performance that may be contributing, however, this finding provides a tool that can be used to measure impact before and after interventions.



## INTRODUCTION

Medical errors, are estimated to be the third leading cause of death in the United States (US) and the 14<sup>th</sup> leading cause worldwide.[1-3] The total aggregated cost of adverse safety events and errors is estimated to amount to trillions of dollars each year. [3] Medicine is both an important and imperfect field, combining science with art and humans with technology. In 1999, the world became aware that patients not only die from disease and traumatic events, some also die or are injured unintentionally through the provision of clinical care.[4] The landmark Institute of Medicine report estimated that the number of people who die every year due to preventable medical errors in the US alone, is equivalent to 3 jumbo jet crashes every 2 days, or one patient every 15 minutes, with over 1 million estimated to be harmed. Studies of medical errors have generally focused on adults and inpatient settings.[5-7] However, medical errors are also an important source of harm for pediatric patients with estimates of 70,000 pediatric inpatients harmed per year by medical errors.[8, 9] A more recent report, emphasizes that the cost of medical errors is proportionately more devastating to countries of low economic status.[10] Even less is known about the epidemiology, etiology, and risk factors for preventable adverse events in the care of children in the Emergency Medical Services (EMS) system where children first receive care for emergencies outside of the hospital.

Non-technical skills such as good communication and teamwork are critical in avoiding medical errors and assuring the safety of patients.[3] The World Health Organization considers communication to be the leading cause of unintentional patient harm.[11] Past reviews have indicated that aspects of teamwork such as leadership, teamwork, situation awareness and decision making are largely correlated with the clinical success of teams.[12-14] For example, a

1  
2  
3 study evaluating teamwork in the Intensive Care Unit indicated that 37% of teamwork failures  
4 were due to verbal communication errors between physicians and nurses.[15] There have been  
5 interventions to reduce medical errors such as implementing computerized provider order-entry  
6 systems, limiting residents' work shifts to consecutive hours, and implementing evidence-based  
7 care bundles. A large retrospective study from the US Veterans Affairs Hospital found that  
8 inpatient surgical mortality was reduced 18% following team training interventions.[16]  
9  
10 However, lack of prospective and detailed evaluation of teamwork elements and specific errors  
11 limit our understanding of the effectiveness of these practices.[17] The goal of this study was to  
12 examine the relationship between measured teamwork and adverse safety events in the  
13 prehospital emergency care of children using high-fidelity simulation.  
14  
15  
16  
17  
18  
19  
20  
21  
22  
23  
24  
25  
26  
27

## 28 **METHODS**

29 We followed STROBE guidance for reporting of observational studies.[18] The Oregon Health  
30 & Science University Institutional Review Board (IRB00006942) approved the study and all  
31 subjects signed both study and video consent prior to participation.  
32  
33  
34  
35  
36  
37  
38  
39

### 40 **Study Participants**

41 In total, 176 simulations were performed over a 6-month timeframe with 44 teams of emergency  
42 medical services (EMS) providers recruited from public fire and private transport crews in three  
43 large counties surrounding Portland, Oregon in the United States. Portland is the largest city in  
44 Oregon and the three county area that participated in this study serves a population of 1.8  
45 million. The EMS system in this region has dual-Advanced Life Support response to all 911  
46 calls with public fire agencies, responding in teams of 3-5 individuals with at least one  
47  
48  
49  
50  
51  
52  
53  
54  
55  
56  
57  
58  
59  
60

1  
2  
3 paramedic, and a private transport agency, responding in 2-person teams with at least one  
4  
5 paramedic. We conducted all simulations in the field ,using high-fidelity simulators, scene  
6  
7 design, and professional actors playing roles of parents and bystanders, with both fire and  
8  
9 transport EMS teams responding to each scenario as they normally would when providing  
10  
11 clinical care. Participants ranged from Emergency Medical Technician (EMT) to paramedic,  
12  
13 with each team including at least one paramedic.  
14  
15  
16  
17  
18

19 Forty-four fire/transport teams consisting of 259 EMS professionals were available in the three-  
20  
21 county region during our study timeframe and consented to participate. All who consented  
22  
23 completed the study. One individual withdrew consent to have his/her individual data analyzed  
24  
25 after completing the simulation sessions for personal reasons, but agreed to analysis of team-  
26  
27 level data for all simulation sessions he/she had participated. In total, we analyzed team-level  
28  
29 data from 44 teams and individual-level data from 258 EMS professionals.  
30  
31  
32  
33  
34

### 35 **Patient Involvement**

36  
37 The EMS-C Children’s Safety Initiative is an observational study with a specific focus on EMS  
38  
39 providers. Patients were not involved in the design, recruitment, or conduct of the study.  
40  
41  
42  
43

### 44 **Simulations**

45  
46 Each fire/ambulance team participated in four simulation scenarios: (1) cardiac arrest in newborn  
47  
48 (Newborn Resuscitation Program, NRP), (2) cardiac arrest in child (Pediatric Advanced Life  
49  
50 Support PALS), (3) non-accidental trauma (NAT), and (4) accidental trauma from pedestrian-  
51  
52 motor vehicle collision (MVC). Simulations were developed by a diverse team with experience  
53  
54  
55  
56  
57  
58  
59  
60

1  
2  
3 in patient safety, simulation, medical and EMS education, pediatric emergency medicine,  
4  
5 advanced life support training, and emergency medical services. Professional actors who each  
6  
7 had several years' experience working as standardized patients in simulations played the roles of  
8  
9 patients and family members. They read through a standardized script and the full simulations  
10  
11 and debriefings were beta tested exactly as they would run with participants with several EMS  
12  
13 teams in two different EMS agencies, not participating in the study. Simulations were conducted  
14  
15 in the field using high-fidelity simulators, scene design, and professional actors playing roles of  
16  
17 parents and bystanders. EMS crews responded in their agency vehicles after receiving a radio  
18  
19 dispatch. Simulators included Victoria™ birthing patient simulator and the Newborn Hal™  
20  
21 simulator from Gaumard™, and Sim Jr.™ 6-year-old child and sim NewB™ newborn simulators  
22  
23 from Laerdal™. Settings included street (motor vehicle collision or MVC), simulated apartment  
24  
25 bedroom for birth (neonatal resuscitation protocol or NRP), disheveled family room (neonatal  
26  
27 abuse trauma or NAT), simulated care facility for eight year old with cardiac arrest (pediatric  
28  
29 advanced life support or PALS) and all simulations were allowed to continue though transport in  
30  
31 the agency's own ambulances.  
32  
33  
34  
35  
36  
37  
38  
39

40 In the NRP scenario, the patient presented as a newborn who was initially responsive upon  
41  
42 delivery but subsequently developed a weak cry, flaccid extremities, bradycardia, and cyanosis  
43  
44 requiring resuscitation. For the PALS case, the patient presented as a six-year-old boy with  
45  
46 symptomatic bradycardia that progressed to pulseless electrical activity with a reported history of  
47  
48 developmental disabilities, seizures, and cerebral palsy, living in a care facility. In the NAT case,  
49  
50 a six-month-old patient had “fallen” from the couch and was unconscious and unresponsive with  
51  
52 bruising consistent with inflicted injury. In the MVC scenario, the patient was a three-month-old  
53  
54  
55  
56  
57  
58  
59  
60

1  
2  
3 child who, while in a stroller, was stuck by a car. The patient had a large scalp wound and was  
4  
5 initially crying but shortly after developed decreased responsiveness, hypertension, bradycardia,  
6  
7 and slow respirations. Makeup was used to simulate bruising, bleeding and lacerations in a  
8  
9 standardized manner for each scenario. Each scenario followed a previously determined  
10  
11 algorithm for improvement or decompensation of the patient's status along pre-specified time  
12  
13 intervals according to performance of specific critical actions also specified in advance. All  
14  
15 scenarios were pilot tested among EMS teams who did not subsequently participate in the study.  
16  
17 Scenarios were revised as needed based on feedback from pilot testing. Professionally trained  
18  
19 actors played all confederate roles in the scenarios to enhance realism.  
20  
21  
22  
23  
24  
25

26 For the purpose of standardization, simulation scenarios concluded after approximately 10  
27  
28 minutes. If the team initiated a procedure close to the 10-minute mark, such as calculating and  
29  
30 drawing up a medication, the simulation was allowed to continue to complete observation of the  
31  
32 task in process and reduce the chances of an awkward end to the scenario. If the care protocols  
33  
34 proceeded rapidly, and the condition of the patient was stable and transport action had begun, the  
35  
36 simulation could be concluded before the 10-minute point. After finishing all four scenarios,  
37  
38 teams returned for a 30-minute debriefing session.  
39  
40  
41  
42  
43  
44

45 Simulation scenarios were presented to teams in random order to minimize the potential bias that  
46  
47 may occur from conditioning as teams become familiar with the simulators and working with  
48  
49 each other. Fire and transport crews responded to each scenario in their own fire engines and  
50  
51 ambulances after receiving a scripted radio dispatch. Each crew used their own equipment or  
52  
53 alternatively used training kits that were replicas of the kits they usually carry. The crews varied  
54  
55  
56  
57  
58  
59  
60

1  
2  
3 who arrived on scene first (ambulance or fire department) and at times arrived simultaneously to  
4  
5 mimic local practice. Crews were able to move the patient simulators to the transport vehicle and  
6  
7 mimic patient transport to the hospital. If transport was started, the crews would assign a driver  
8  
9 and those who remained inside the transport vehicle would continue to administer patient care.  
10  
11 All crews were aware they were participating in simulated emergencies and were oriented to the  
12  
13 study and mannequins prior to participation. To allow for anonymous tracking of each  
14  
15 participant by role, the crew members wore colored tape markers on their shoulders. The fire  
16  
17 crews also varied the person-in-charge (PIC) assignment for each scenario, although the crew  
18  
19 membership was consistent.  
20  
21  
22  
23  
24  
25

## 26 **Data Collection**

27  
28 Prior to simulations, participants completed a survey asking about demographic characteristics,  
29  
30 training and their experience in Emergency Medical Services.  
31  
32  
33  
34

35 One of two subject matter experts (JMG & MH) experienced in using the Clinical Teamwork  
36  
37 Scale (CTS™) directly observed simulations in real time and measured teamwork using the  
38  
39 CTS™, a validated instrument that measures overall teamwork and 15 specific elements in 5  
40  
41 overarching domains in addition to overall teamwork: communication, decision making, role  
42  
43 responsibility (leadership and followership), situational awareness/resource management and  
44  
45 patient-friendliness.[19] CTS™ was selected because the authors were skilled in its use having  
46  
47 developed it over a decade ago with a diverse team (that included one of the founders of crew  
48  
49 resource management (CRM)), it was designed specifically to allow quick assessments of  
50  
51 teamwork during rapidly moving clinical emergencies, it is free, and has been successfully used  
52  
53  
54  
55  
56  
57  
58  
59  
60

1  
2  
3 by us and numerous others to measure teamwork in emergent clinical scenarios similar to our  
4 intended purpose: pediatric resuscitations, obstetrics, trauma, advanced cardiac life support, and  
5 emergency medical services.[20-27] Evaluators rate the performance of the care team using a  
6 Likert scale of zero (unacceptable) to 10 (perfect) and are given space to insert narrative  
7 comments. In validation studies, the CTS™ has demonstrated substantial score concordance  
8 among raters, and excellent interrater reliability.[26-28] A systematic review of tools that have  
9 been used to measure teamwork recently concluded that CTS™ was superior to other tools for  
10 measuring teamwork citing content and construct validity as well as reliability and ease of  
11 use.[29] Prior to the study, simulations were pilot tested with EMS teams not involved in the  
12 study. During this time, both reviewers scored teamwork independently using CTS™ arrived at  
13 consensus and repeated independent assessments of new simulations to arrive at consistency.  
14 Two reviewers were present, independently scored scenarios and came to consensus at the end of  
15 pilot tests and during more than half of all study simulations.

### 32 **Error Measurement**

33 During the simulations, the evaluators noted the number of errors and described what the error  
34 entailed using standard taxonomy. For purposes of this study, errors were collapsed into whether  
35 an error was present or not present. Similar to CTS, when both reviewers were present (>50% of  
36 the time) a consensus was reached at the end regarding errors. When there was uncertainty over  
37 whether an action may or may not have constituted an error, the team discussed to reach  
38 consensus. For the remaining scenarios, a single reviewer rated the errors.

### 50 **Statistical analysis**

1  
2  
3 A completed case analysis was used; due to missing data on key variables, 6 of 176 (3.4%) of  
4 simulation scenarios were dropped from analysis. We summarized error proportion by each  
5 simulated clinical scenario, and summarized teamwork (CTS™ teamwork score) by the presence  
6 or absence of an error. We summarized teamwork as the overall CTS™ score and also by each  
7 score in the five sub-domains of the CTS™. Scores were compared between groups using *t*-tests  
8 for unequal variances. A generalized estimating equation (GEE) logistic regression model was  
9 used to estimate the odds of error with increasing CTS™ score in SAS GENMOD (version 9.4  
10 SAS Institute Inc., Carey, NC). Although the order of the four simulation scenarios was  
11 randomized by EMS teams, in analysis we controlled for the potential correlation of errors by  
12 team using an exchangeable correlation structure clustered by teams. Our choice to use the  
13 exchangeable correlation structure also should be robust to errors in adjacent simulation  
14 scenarios and comparisons to those farther apart in time on the testing day, as well as scenarios  
15 that may share similar characteristics (e.g., same age of pediatric patient). assumes that the  
16 correlation between errors. We tested for confounding by scenario and years of EMS experience.  
17 A *p*-value of <0.05 was considered statistically significant.  
18  
19  
20  
21  
22  
23  
24  
25  
26  
27  
28  
29  
30  
31  
32  
33  
34  
35  
36  
37  
38  
39

## 40 RESULTS

41  
42 Table 1 shows demographic characteristics and self-reported professional experience of EMS  
43 responders participating in the simulation sessions.  
44  
45  
46  
47  
48  
49  
50  
51

52 **Table 1: Characteristics of EMS Personnel Participating in Simulations**

| Characteristic | N (%) |
|----------------|-------|
|----------------|-------|



|                                                                                      |      |        |
|--------------------------------------------------------------------------------------|------|--------|
| Mean Age years (S.D) <sup>a</sup>                                                    | 36.9 | (8.47) |
| Gender <sup>b</sup>                                                                  |      |        |
| Female                                                                               | 36   | (14.0) |
| Race/Ethnicity <sup>c</sup>                                                          |      |        |
| White                                                                                | 220  | (89.1) |
| Black or African American                                                            | 0    | (0)    |
| American Indian or Alaska Native                                                     | 6    | (2.43) |
| Asian                                                                                | 4    | (1.62) |
| Native Hawaiian or Other Pacific Islander                                            | 2    | (0.81) |
| Hispanic or Latino                                                                   | 7    | (2.83) |
| Other/Two or More Races                                                              | 8    | (3.24) |
| Training Level <sup>b</sup>                                                          |      |        |
| Emergency Medical Responder (EMR)                                                    | 0    | (0)    |
| Emergency Medical Technician (EMT)                                                   | 100  | (38.9) |
| Advanced EMT                                                                         | 2    | (0.78) |
| EMT-Intermediate                                                                     | 25   | (9.73) |
| Paramedic                                                                            | 128  | (49.8) |
| Paramedic Intern                                                                     | 2    | (0.78) |
| Years' Experience Working in EMS <sup>d</sup>                                        | 11.7 | (7.84) |
| Proficiency in Pediatric EMS on a Scale of 1 ("Novice") to 5 ("Expert") <sup>b</sup> | 2.55 | (0.89) |

a) n = 256, b) EMS n = 257, c) n = 247, d) n = 258

At least one error was observed in 82% of the 176 simulation scenarios for which the presence or absence of errors was recorded. Due to missing data for overall CTS™ score, data for six

scenarios were not included in the logistic regression analysis. Table 2 describes the types of errors observed.

**Table 2: Taxonomy of Observed Errors**

| <b>Errors</b>                             | <b>Type</b>                                                                 |
|-------------------------------------------|-----------------------------------------------------------------------------|
| <b><i>Diagnostic &amp; Management</i></b> | Assessment, algorithm, diagnostic, management, decision making              |
| <b><i>Medication</i></b>                  | Wrong medication, dose, route, sequence, type, IV fluid issue, etc.         |
| <b><i>Technical</i></b>                   | Wrong device, size, bagging, intubation, CPR, defibrillator, immobilization |
| <b><i>Scene/Environment</i></b>           | Scene safety, scene time, positioning, patient/family                       |

The overall CTS™ score was normally distributed, with a mean of 6.04 (SD = 2.10; min = 1 (poor) and max = 10 (perfect)) in the 170 simulations with recorded overall CTS™ scores. The distributions of overall CTS™ scores were similar across the four scenarios. In simulations with an overall CTS™ score and at least one observed error (n = 138), the mean CTS™ score was 5.76 (SD = 2.04) compared with 7.16 (SD = 1.95) in scenarios with no observed error (n = 32). The t tests demonstrated that this difference was statistically significant (p-value = 0.0007). For each individual simulation scenario, teams with no errors had higher CTS™ scores than teams with one or more errors. There were statistically significant differences in CTS™ scores between teams with no errors and teams with errors in the Non-Accidental Trauma simulation and the Newborn Cardiac Arrest simulation, with the no error teams having significantly greater CTS™ scores. Table 3 provides comparative data for CTS™ scores between teams with and without errors by simulation scenario.

**Table 3: Comparing CTS™ Overall Teamwork Score Between Teams With and Without Errors by Simulation Scenario**

| Simulation Scenario         | No Error   | One or More Errors | t <sup>+</sup> | P value |
|-----------------------------|------------|--------------------|----------------|---------|
|                             | (mean, SD) | (mean, SD)         |                |         |
| Motor Vehicle Collision     | 6.20(2.25) | 5.91(1.96)         | 0.37           | 0.72    |
| Non-Accidental Trauma       | 8.20(1.10) | 5.57(2.03)         | 4.39           | *0.0019 |
| Newborn Cardiac Arrest      | 7.55(1.97) | 5.79(2.18)         | 2.5            | *0.022  |
| Six-Year-Old Cardiac Arrest | 7.17(1.60) | 5.78(2.09)         | 1.88           | 0.097   |
| All Simulations             | 7.16(1.95) | 5.76(2.04)         | 3.61           | *0.0007 |

<sup>+</sup>Satterhwaite t-test for unequal variances

\*significant at alpha=0.05

After comparing an unadjusted GEE logistic regression model to a model controlling for scenario and mean years of EMS experience, there were no significant differences in the effect estimate for CTS™ score or significance of estimates (Table 4). This indicates that the relationship between overall CTS™ and odds of error was not confounded by scenario or years of EMS experience; thus, the final model reported is unadjusted for these variables. Logistic regression analysis accounting for clustering at the team-level revealed that the odds of an error decreased 28% with each unit increase in CTS™ (Odds Ratio = 0.72, 95% Confidence Interval 0.59 – 0.88).

**Table 4. GEE Logistic Regression Models Testing Associations between Teamwork and Errors**

| Predictor Variable          | Unadjusted |             |      |         | Adjusted <sup>+</sup> |              |       |         |
|-----------------------------|------------|-------------|------|---------|-----------------------|--------------|-------|---------|
|                             | OR         | 95% CI      | Z    | p-value | OR                    | 95% CI       | Z     | p-value |
| CTS Score (1-unit increase) | 0.72       | (0.59,0.88) | -3.2 | 0.0014  | 0.73                  | (0.59,0.89)  | -3.06 | 0.0022  |
| MVC                         | -          | -           | -    | -       | 0.45                  | (0.18,1.17)  | -1.63 | 0.1034  |
| NRP                         | -          | -           | -    | -       | 0.46                  | (0.20,1.04)  | -1.87 | 0.0618  |
| PALS                        | -          | -           | -    | -       | 0.88                  | (0.25,3.03)  | -0.21 | 0.8352  |
| NAT                         | -          | -           | -    | -       | REF                   | -            | -     | -       |
| Mean Years EMS Experience   | -          | -           | -    | -       | 0.92                  | (0.79, 1.07) | -1.07 | 0.284   |

<sup>+</sup>Adjusted for clinical scenario (NAT = reference group) and mean years of EMS experience at the team level

1  
2  
3 Within the simulations, the percentage of teams that completed a simulation without error was  
4 highest in the Newborn Cardiac Arrest simulation (25%). The simulation with the highest  
5  
6 highest in the Newborn Cardiac Arrest simulation (25%). The simulation with the highest  
7  
8 percentage of teams with one or more error was the Non-Accidental Trauma simulation, with  
9  
10 89% of simulation having at least one error. Bivariable analysis suggested that adverse safety  
11  
12 events are more likely in teams with low teamwork scores.  
13  
14

15  
16  
17 Adverse safety events were also more likely in teams with lower individual scores in  
18  
19 communication, situational awareness, decision-making, and leadership/followership (Table 5).  
20  
21

22  
23 **Table 5: CTS™ Domain-specific Ratings in Simulations with and without Any Observed**  
24 **Error**

| <b>Error</b>                                                | <b>CTS™ Item Rating</b>        |                                          |                |
|-------------------------------------------------------------|--------------------------------|------------------------------------------|----------------|
| <i>CTS™ Item</i>                                            | <i>No Error<br/>(mean, SD)</i> | <i>One or More Errors<br/>(mean, SD)</i> | <i>P Value</i> |
| Overall Communication <sup>a</sup>                          | 7.13 (2.21)                    | 5.89 (2.00)                              | 0.002          |
| Overall Situational Awareness <sup>b</sup>                  | 7.31 (2.07)                    | 6.26 (2.25)                              | 0.01           |
| Overall Decision Making <sup>c</sup>                        | 7.26 (2.07)                    | 5.49 (2.35)                              | <0.001         |
| Overall Role Responsibility<br>(Leader/Helper) <sup>d</sup> | 7.25 (1.74)                    | 6.06 (1.92)                              | 0.001          |
| Patient Friendliness <sup>d</sup>                           | 7.13 (2.56)                    | 6.44 (2.17)                              | 0.16           |

25  
26  
27  
28  
29  
30  
31  
32  
33  
34  
35  
36  
37  
38 a) n = 160, b) n = 170, c) n = 167, d) n = 163  
39  
40  
41

42 Compared with teams with one or more errors, teams without any errors had higher CTS™  
43 scores across all itemized categories of the CTS™ (Overall Communication, Overall Situational  
44 Awareness, Overall Decision making, Overall Role Responsibility, and Patient Friendliness).  
45  
46 Among these categories, teams with no error had significantly higher CTS™ scores for Overall  
47 Communication, Overall Situational Awareness, Overall Decision Making, and Overall Role  
48 Responsibility (Leadership/Helper).  
49  
50  
51  
52  
53  
54  
55  
56  
57  
58  
59  
60

## DISCUSSION

In this study of simulated pediatric prehospital emergencies, we observed a higher frequency of errors in teams with lower-rated teamwork scores. This finding was observed consistently across a variety of clinical scenarios (e.g., both newborn cardiac arrest and non-accidental trauma) and teamwork sub-domains (e.g., communication and situational awareness). Our study builds on the prior research on the role of teamwork in medical errors, which has mostly been conducted in the hospital setting.[30, 31] Using high-fidelity simulation scenarios and a validated teamwork measurement tool, we extended this research to the pediatric prehospital emergency care setting, and found an association between teamwork and medical errors.

The results were robust to multivariable regression adjustment, suggesting that breakdowns in teamwork are indeed a factor contributing to the high error rates observed in this study. These findings add strength to the WHO's description of communication as a leading cause of unintentional harm and further elaborate on the importance of teamwork in decreasing errors.[11] Additionally, These findings provide a nice complement to the work on surgical mortality and team training[16] as this provides a mechanism to measure the immediate intervening factors that are likely in the causal pathway.

Given the large cost and morbidity burden associated with medical errors worldwide, these findings suggest directions for future research and also have policy implications.[3, 10] Most immediately, however, more studies are needed to confirm this association both in this specific healthcare setting as well as other clinical areas where team-based care is the norm. For example, future studies should examine the contribution of teamwork to medical errors in hospital

1  
2  
3 emergency medical care to continue building our understanding of the role of teamwork beyond  
4 the ICU. Improving team work is a relatively low cost intervention to improve patient outcomes.  
5  
6 Thus this direction of research is important internationally, and may be particularly critical for  
7  
8 countries of low economic means, who are impacted heavily by the financial burdens. [10]  
9  
10  
11  
12  
13

14 We used a validated measure of teamwork, the CTST<sup>TM</sup>. CTST<sup>TM</sup> has been used around the world  
15 in different settings and clinical care areas. [26-28] Future studies should utilize this measure  
16 and also continue to refine methods for measuring the multi-modal concept of teamwork in  
17 health care systems around the world. Given the complexity of teamwork and the inherent  
18 challenges in measuring it (e.g., different evaluations based on different parties, the limitations of  
19 self-reported/self-scored data, etc.), additional research will be needed to provide a full picture of  
20 the role of teamwork in patient outcomes. In clinical settings where our findings are replicated, it  
21 will be essential to consider interventions, training, and policies to prevent teamwork-associated  
22 medical errors.  
23  
24  
25  
26  
27  
28  
29  
30  
31  
32  
33  
34  
35  
36  
37

38 There are several important limitations to consider. We conducted simulations and measured  
39 teamwork in one geographic region with a specific EMS system design which may not be  
40 representative of other areas. Although we employed best-practices in conducting our  
41 simulations and measuring teamwork (e.g., cutting-edge simulation models, the use of trained  
42 actors, a validated teamwork measurement scale), our study examined simulated healthcare  
43 encounters, rather than actual healthcare. However, due to the rare nature of critical pediatric  
44 emergencies in EMS, direct observation of care is not feasible on this scale. Next, we do not  
45 know if poorer teamwork is the cause of errors or if it is simply associated with other deficits in  
46  
47  
48  
49  
50  
51  
52  
53  
54  
55  
56  
57  
58  
59  
60

1  
2  
3 performance that may be contributing, such as medical knowledge. Further, the appraisal of  
4 errors and assignment of teamwork scores were performed by humans using their best  
5 judgement, which is a method subject to bias. Finally, while the amount of missing data were  
6 small, we dealt with missing data using complete-case analysis (170 complete of 176 available  
7 cases). The analytic approach to missing data continues to be a subject of active investigation  
8 with recent writings suggesting that the best approach is to think through the likely causes of bias  
9 and select the analytic method that is least likely to introduce bias and best able to reduce  
10 bias.[32] Although several options are available for addressing missingness (e.g., multiple  
11 imputation approaches), several features of our specific data raised questions about the  
12 applicability of these approaches in our study. Our data structure includes nested, non-  
13 independent observations, where the same clinical team participated in clinically distinct  
14 simulations and different clinical teams participated in each clinical simulation. Given this, it did  
15 not seem appropriate to impute scores from other clinical teams in the same clinical scenario to  
16 the team with missing data, as this would assume that the clinical performance of teams was  
17 homogeneous. In the same note, it did not seem appropriate to assume that one clinical team  
18 would perform similarly on clinical cases that were very distinct. Given that neither of these  
19 assumptions seemed appropriate and also that our total number of missing data was small, the  
20 most honest interpretation of our data seemed to be complete case analysis. In conclusion, we  
21 found that teamwork is highly correlated with errors in simulated pediatric prehospital  
22 emergencies and this finding was robust across four different simulation scenarios as well as  
23 across sub-domains of teamwork.

## 54 CONCLUSION

1  
2  
3 Overall teamwork is strongly associated with the risk of adverse events in critically ill and  
4  
5 injured children.  
6  
7  
8  
9  
10  
11  
12  
13  
14  
15  
16  
17  
18  
19  
20  
21  
22  
23  
24  
25  
26  
27  
28  
29  
30  
31  
32  
33  
34  
35  
36  
37  
38  
39  
40  
41  
42  
43  
44  
45  
46  
47  
48  
49  
50  
51  
52  
53  
54  
55  
56  
57  
58  
59  
60

For peer review only



## DECLARATIONS

### Acknowledgements

None

### Ethics approval and consent to participate

The study was approved by Oregon Health & Science University's Institutional Review Board, IRB Approval# 00006942.

### Competing interests

The authors have no conflict of interest to report.

### Funding

This work was supported by the National Institute of Child Health and Human Development, Grant No. 1R01HD062478.

**Data Sharing:** Aggregated data specific to this publication would be made available upon request.

**Author Contributions:** All authors contributed significantly to this work. SH is first author. JMG and WL obtained funding. SH, MH, BS, JS, JM, WL, and JMG conceived and designed the study. SH, MH, BS, JM, TH, WL, and JMG performed the simulations and participated in acquisition of data. SH, BS, AS, JS, WL, and JMG analyzed the data. SH, BS, JS, WL, and JMG wrote the first draft of the paper. SH, AS, WL, JS, and JMG conducted additional analyses and made revisions to the paper from peer review. All authors have read, edited, and approved the final manuscript and are able to accept responsibility for the work.

**REFERENCES CITED**

1. Quality Interagency Coordination Task Force. Doing what counts for patient safety: Federal actions to reduce medical errors and their impact. Rockville, MD: Agency for Healthcare and Research Quality; [cited 2017 May 12]. Available from: <https://archive.ahrq.gov/quic/report/mederr4.htm>
2. Makary M, Daniel M. Medical error-the third leading cause of death in the US. *BMJ*. 2016;353:i2139.
3. Slawomirski L, Auraaen A, Klazinga N. The economics of patient safety: Strengthening a value-based approach to reducing patient harm at national level. Paris, France: Organisation for Economic Co-operation and Development, 2017.
4. Committee on Quality of Health Care in America. To err is human: Building a safer health system. Institute of Medicine, editor. Washington, DC: National Academy Press; 1999.
5. Aranaz-Andres J, Aibar-Remon C, Vitaller-Burillo J, Requena-Puche J, Terol-Garcia E, Kelley E, et al. Impact and preventability of adverse events in Spanish public hospitals: results of the Spanish National Study of Adverse Events (ENEAS). *Int J Qual Health Care*. 2009;21(6):408-14.
6. Westbrook J, Li L, Lehnbohm E, Baysari MT, Braithwaite J, Burke R, et al. What are incident reports telling us? A comparative study at two Australian hospitals of medication errors identified at audit, detected by staff and reported to an incident system. *Int J Qual Health Care*. 2015;27(1):1-9.

- 1  
2  
3 7. Giraldo P, Sato L, Sala M, Comas M, Dywer K, Castells X. A retrospective review of  
4 medical errors adjudicated in court between 2002 and 2012 in Spain. *Int J Qual Health*  
5 *Care*. 2016;28(1):33-9.  
6  
7
- 8 8. Kaushal R, Bates D, Landrigan C. Medication errors and adverse drug events in pediatric  
9 inpatients. *JAMA*. 2001;285(16):2114-20.  
10  
11
- 12 9. Woods D, Thomas E, Holl J, al. e. Adverse events and preventable adverse events in  
13 children. *Pediatrics*. 2005;115(1):155-60.  
14  
15
- 16 10. National Academies of Sciences, Engineering and Medicine. *Crossing the Global Quality*  
17 *Chasm: Improving Health Care Worldwide*. Washington, DC: 2018.  
18  
19
- 20 11. Katzenbach J, Smith D. *The discipline of teams*. Boston, MA: Harvard Business Press;  
21 2008.  
22  
23
- 24 12. Baker D, Gustafson S, Beaubien J, al. e. *Medical teamwork and patient safety: The*  
25 *evidence-based relation*. Rockville, MD: Agency for Healthcare and Research Quality,  
26 2005.  
27  
28
- 29 13. Manser T. *Teamwork and patient safety in dynamic domains of healthcare: A review of*  
30 *the literature*. *Acta Anaesthesiol Scand*. 2009;53(2):143-51.  
31  
32
- 33 14. Sorbero M, Farley D, Mattke S, al. e. *Outcomes measures for effective teamwork in*  
34 *inpatient care*. Santa Monica, CA: RAND Corporation, 2008.  
35  
36
- 37 15. Donchin Y, Gopher D, Olin M, al. e. A look into the nature and causes of human errors in  
38 the intensive care unit. *Crit Care Med*. 1995;23(2):294-300.  
39  
40
- 41 16. Neily J, Mills P, Young-Xu Y, Carney B, West P, Berger D, et al. Association between  
42 implementation of a medical team training program and surgical mortality. *JAMA*.  
43 2010;304(15):1693-700.  
44  
45  
46  
47  
48  
49  
50  
51  
52  
53  
54  
55  
56  
57  
58  
59  
60

17. Landrigan C. Resident sleep deprivation and critical care: the unintended consequences of inaction. *Crit Care Med*. 2010;38(3):980-1.
18. von Elm E, Altman D, Egger M, Pocock S, Gøtzsche P, Vandenbroucke J. The Strengthening of Reporting of Observational Studies in Epidemiology (STROBE) statement: guidelines for reporting observational studies. *PLoS Med*. 2007;4(10):e296.
19. Guise J, Deering S, Kanki B, al. e. Validation of a tool to measure and promote clinical teamwork. *Simul Healthc*. 2008;3(4):217-23.
20. Gilfoyle E, Koot D, Annear J, Bhanji F, Cheng A, Duff J, et al. Improved Clinical Performance and Teamwork of Pediatric Interprofessional Resuscitation Teams With a Simulation-Based Educational Intervention. *Pediatr Crit Care Med*. 2017;18(2):e62-e9.
21. Lau Y, Chee D, Ab Hamid Z, Leong B, Lau S. Interprofessional Simulation-Based Advanced Cardiac Life Support Training: Video-Based Observational Study. *Clin Sim Nurs*. 2019;30:16-24.
22. Parush A, Mastoras G, Bhandari A, Momtahan K, Day K, Weitzman B, et al. Can teamwork and situational awareness (SA) in ED resuscitations be improved with a technological cognitive aid? Design and a pilot study of a team situation display. *J Biomed Inform*. 2017;76:154-61.
23. Ghazali D, Darmian-Rafei I, Ragot S, Oriot D. Performance Under Stress Conditions During Multidisciplinary Team Immersive Pediatric Simulations. *Pediatr Crit Care Med*. 2018;19(6):e270-e8.
24. Paull D, Deleeuw L, Wolk S, Paige J, Neily J, Mills P. The effect of simulation-based crew resource management training on measurable teamwork and communication among

- 1  
2  
3 interprofessional teams caring for postoperative patients. *J Contin Educ Nurs*.  
4  
5 2013;44(11):516-24.  
6  
7  
8 25. Letchworth P, Duffy S, Phillips D. Improving non-technical skills (teamwork) in post-  
9  
10 partum haemorrhage: A grouped randomised trial. *Eur J Obstet Gynecol Reproductive*  
11  
12 *Biol*. 2017;217:154-60.  
13  
14  
15 26. Fransen A, van de Ven J, Merien A, de Wit-Zuurendonk L, Houterman S, Mol B, et al.  
16  
17 Effect of obstetric team training on team performance and medical technical skills: a  
18  
19 randomised controlled trial. *BJOG*. 2012;119(11):1387-93.  
20  
21  
22 27. Miller D, Crandall C, Washington C, 3rd, McLaughlin S. Improving teamwork and  
23  
24 communication in trauma care through in situ simulations. *Acad Emerg Med*.  
25  
26 2012;19(5):608-12.  
27  
28  
29 28. Banga F, Truijens S, Fransen A, Dieleman J, van Runnard Heimel P, Oei G. The impact  
30  
31 of transmural multiprofessional simulation-based obstetric team training on perinatal  
32  
33 outcome and quality of care in the Netherlands. *BMC Med Educ*. 2014;14:175.  
34  
35  
36 29. Fransen A, de Boer L, Kienhorst D, Truijens S, van Runnard Heimel P, Oei S. Assessing  
37  
38 teamwork performance in obstetrics: A systematic search and review of validated tools.  
39  
40 *Eur J Obstet Gynecol Reproductive Biol*. 2017;216:184-91.  
41  
42  
43 30. van de Ven J, Houterman S, Steinweg R, Scherpbier A, Wijers W, Mol B, et al. Reducing  
44  
45 errors in health care: cost-effectiveness of multidisciplinary team training in obstetric  
46  
47 emergencies (TOSTI study); a randomised controlled trial. *BMC Preg Childbirth*.  
48  
49 2010;10:59.  
50  
51  
52  
53  
54  
55  
56  
57  
58  
59  
60

- 1  
2  
3 31. McCulloch P, Mishra A, Handa A, Dale T, Hirst G, Catchpole K. The effects of aviation-  
4 style non-technical skills training on technical performance and outcome in the operating  
5 theatre. Qual Safe Health Care. 2009;18(2):109-15.  
6  
7  
8  
9  
10 32. Dong Y, Peng C. Principled missing data methods for researchers. SpringerPlus.  
11  
12 2013;2(1):222.  
13  
14  
15  
16  
17  
18  
19  
20  
21  
22  
23  
24  
25  
26  
27  
28  
29  
30  
31  
32  
33  
34  
35  
36  
37  
38  
39  
40  
41  
42  
43  
44  
45  
46  
47  
48  
49  
50  
51  
52  
53  
54  
55  
56  
57  
58  
59  
60

For peer review only

## STROBE Statement—checklist of items that should be included in reports of observational studies

|                              | Item No | Recommendation                                                                                                                                                                                                                                                                                                                                                                                                                                                         | Page #   |
|------------------------------|---------|------------------------------------------------------------------------------------------------------------------------------------------------------------------------------------------------------------------------------------------------------------------------------------------------------------------------------------------------------------------------------------------------------------------------------------------------------------------------|----------|
| <b>Title and abstract</b>    | 1       | (a) Indicate the study's design with a commonly used term in the title or the abstract                                                                                                                                                                                                                                                                                                                                                                                 | 1        |
|                              |         | (b) Provide in the abstract an informative and balanced summary of what was done and what was found                                                                                                                                                                                                                                                                                                                                                                    | 2        |
| <b>Introduction</b>          |         |                                                                                                                                                                                                                                                                                                                                                                                                                                                                        |          |
| Background/rationale         | 2       | Explain the scientific background and rationale for the investigation being reported                                                                                                                                                                                                                                                                                                                                                                                   | 4-5      |
| Objectives                   | 3       | State specific objectives, including any prespecified hypotheses                                                                                                                                                                                                                                                                                                                                                                                                       | 5        |
| <b>Methods</b>               |         |                                                                                                                                                                                                                                                                                                                                                                                                                                                                        |          |
| Study design                 | 4       | Present key elements of study design early in the paper                                                                                                                                                                                                                                                                                                                                                                                                                | 5-6      |
| Setting                      | 5       | Describe the setting, locations, and relevant dates, including periods of recruitment, exposure, follow-up, and data collection                                                                                                                                                                                                                                                                                                                                        | 6        |
| Participants                 | 6       | (a) <i>Cohort study</i> —Give the eligibility criteria, and the sources and methods of selection of participants. Describe methods of follow-up<br><i>Case-control study</i> —Give the eligibility criteria, and the sources and methods of case ascertainment and control selection. Give the rationale for the choice of cases and controls<br><i>Cross-sectional study</i> —Give the eligibility criteria, and the sources and methods of selection of participants | 6        |
|                              |         | (b) <i>Cohort study</i> —For matched studies, give matching criteria and number of exposed and unexposed<br><i>Case-control study</i> —For matched studies, give matching criteria and the number of controls per case                                                                                                                                                                                                                                                 | NA       |
| Variables                    | 7       | Clearly define all outcomes, exposures, predictors, potential confounders, and effect modifiers. Give diagnostic criteria, if applicable                                                                                                                                                                                                                                                                                                                               | 7-10     |
| Data sources/<br>measurement | 8*      | For each variable of interest, give sources of data and details of methods of assessment (measurement). Describe comparability of assessment methods if there is more than one group                                                                                                                                                                                                                                                                                   | 9        |
| Bias                         | 9       | Describe any efforts to address potential sources of bias                                                                                                                                                                                                                                                                                                                                                                                                              | 8-9      |
| Study size                   | 10      | Explain how the study size was arrived at                                                                                                                                                                                                                                                                                                                                                                                                                              | 6-7      |
| Quantitative variables       | 11      | Explain how quantitative variables were handled in the analyses. If applicable, describe which groupings were chosen and why                                                                                                                                                                                                                                                                                                                                           | 10-11    |
| Statistical methods          | 12      | (a) Describe all statistical methods, including those used to control for confounding                                                                                                                                                                                                                                                                                                                                                                                  | 10-11    |
|                              |         | (b) Describe any methods used to examine subgroups and interactions                                                                                                                                                                                                                                                                                                                                                                                                    | 10-11    |
|                              |         | (c) Explain how missing data were addressed                                                                                                                                                                                                                                                                                                                                                                                                                            | 10,11,16 |
|                              |         | (d) <i>Cohort study</i> —If applicable, explain how loss to follow-up was addressed<br><i>Case-control study</i> —If applicable, explain how matching of cases and controls was addressed<br><i>Cross-sectional study</i> —If applicable, describe analytical methods taking account of sampling strategy                                                                                                                                                              | NA       |
|                              |         | (e) Describe any sensitivity analyses                                                                                                                                                                                                                                                                                                                                                                                                                                  | NA       |

Continued on next page

| <b>Results</b>           |     |                                                                                                                                                                                                              | <b>Page #</b> |
|--------------------------|-----|--------------------------------------------------------------------------------------------------------------------------------------------------------------------------------------------------------------|---------------|
| Participants             | 13* | (a) Report numbers of individuals at each stage of study—eg numbers potentially eligible, examined for eligibility, confirmed eligible, included in the study, completing follow-up, and analysed            | 7             |
|                          |     | (b) Give reasons for non-participation at each stage                                                                                                                                                         | 7             |
|                          |     | (c) Consider use of a flow diagram                                                                                                                                                                           | NA            |
| Descriptive data         | 14* | (a) Give characteristics of study participants (eg demographic, clinical, social) and information on exposures and potential confounders                                                                     | 7,11, 12      |
|                          |     | (b) Indicate number of participants with missing data for each variable of interest                                                                                                                          | 12            |
|                          |     | (c) <i>Cohort study</i> —Summarise follow-up time (eg, average and total amount)                                                                                                                             | (NA)          |
| Outcome data             | 15* | <i>Cohort study</i> —Report numbers of outcome events or summary measures over time                                                                                                                          | (12-15)       |
|                          |     | <i>Case-control study</i> —Report numbers in each exposure category, or summary measures of exposure                                                                                                         | NA            |
|                          |     | <i>Cross-sectional study</i> —Report numbers of outcome events or summary measures                                                                                                                           | NA            |
| Main results             | 16  | (a) Give unadjusted estimates and, if applicable, confounder-adjusted estimates and their precision (eg, 95% confidence interval). Make clear which confounders were adjusted for and why they were included | (12-15)       |
|                          |     | (b) Report category boundaries when continuous variables were categorized                                                                                                                                    | (12-15)       |
|                          |     | (c) If relevant, consider translating estimates of relative risk into absolute risk for a meaningful time period                                                                                             | NA            |
| Other analyses           | 17  | Report other analyses done—eg analyses of subgroups and interactions, and sensitivity analyses                                                                                                               | NA            |
| <b>Discussion</b>        |     |                                                                                                                                                                                                              |               |
| Key results              | 18  | Summarise key results with reference to study objectives                                                                                                                                                     | 14-15         |
| Limitations              | 19  | Discuss limitations of the study, taking into account sources of potential bias or imprecision. Discuss both direction and magnitude of any potential bias                                                   | 16            |
| Interpretation           | 20  | Give a cautious overall interpretation of results considering objectives, limitations, multiplicity of analyses, results from similar studies, and other relevant evidence                                   | 17            |
| Generalisability         | 21  | Discuss the generalisability (external validity) of the study results                                                                                                                                        | 15-16         |
| <b>Other information</b> |     |                                                                                                                                                                                                              |               |
| Funding                  | 22  | Give the source of funding and the role of the funders for the present study and, if applicable, for the original study on which the present article is based                                                | 18            |

\*Give information separately for cases and controls in case-control studies and, if applicable, for exposed and unexposed groups in cohort and cross-sectional studies.



# BMJ Open

## Association between Measured Teamwork and Medical Errors: An Observational Study of Prehospital Care in the United States

|                                 |                                                                                                                                                                                                                                                                                                                                                                                                                                                                                                                                                                                                                                                                                                                                                                                                                                              |
|---------------------------------|----------------------------------------------------------------------------------------------------------------------------------------------------------------------------------------------------------------------------------------------------------------------------------------------------------------------------------------------------------------------------------------------------------------------------------------------------------------------------------------------------------------------------------------------------------------------------------------------------------------------------------------------------------------------------------------------------------------------------------------------------------------------------------------------------------------------------------------------|
| Journal:                        | <i>BMJ Open</i>                                                                                                                                                                                                                                                                                                                                                                                                                                                                                                                                                                                                                                                                                                                                                                                                                              |
| Manuscript ID                   | bmjopen-2018-025314.R3                                                                                                                                                                                                                                                                                                                                                                                                                                                                                                                                                                                                                                                                                                                                                                                                                       |
| Article Type:                   | Original research                                                                                                                                                                                                                                                                                                                                                                                                                                                                                                                                                                                                                                                                                                                                                                                                                            |
| Date Submitted by the Author:   | 22-Sep-2019                                                                                                                                                                                                                                                                                                                                                                                                                                                                                                                                                                                                                                                                                                                                                                                                                                  |
| Complete List of Authors:       | Herzberg, Simone; Vanderbilt University Medical Center, Medical Scientist Training Program<br>Hansen, Matt; Oregon Health and Science University, Emergency Medicine<br>Schoonover, Amanda; Oregon Health and Science University, Obstetrics and Gynecology<br>Skarica, Barbara; Oregon Health and Science University, Obstetrics and Gynecology<br>McNulty, James; Oregon Health and Science University, Office of Simulation<br>Harrod, Tabria; Oregon Health and Science University, Obstetrics and Gynecology<br>Snowden, Jonathan M.; Oregon Health & Science University, Dept of Obstetrics & Gynecology/Public Health & Preventive Medicine<br>Lambert, William; Oregon Health and Science University, Public Health & Preventative Medicine<br>Guise, Jeanne-Marie ; Oregon Health and Science University, Obstetrics and Gynecology |
| <b>Primary Subject Heading</b>: | Public health                                                                                                                                                                                                                                                                                                                                                                                                                                                                                                                                                                                                                                                                                                                                                                                                                                |
| Secondary Subject Heading:      | Emergency medicine, Health services research, Paediatrics                                                                                                                                                                                                                                                                                                                                                                                                                                                                                                                                                                                                                                                                                                                                                                                    |
| Keywords:                       | Patient Safety, Medical Errors, Patient Care Team, Emergency Medical Services, Teamwork, Pediatric                                                                                                                                                                                                                                                                                                                                                                                                                                                                                                                                                                                                                                                                                                                                           |
|                                 |                                                                                                                                                                                                                                                                                                                                                                                                                                                                                                                                                                                                                                                                                                                                                                                                                                              |

SCHOLARONE™  
Manuscripts

# Association between Measured Teamwork and Medical Errors: An Observational Study of Prehospital Care in the United States

**Authors:** Simone Herzberg<sup>1,2</sup>, Matthew Hansen<sup>3</sup>, Amanda Schoonover<sup>2</sup>, Barbara Skarica<sup>2</sup>, James McNulty<sup>4</sup>, Tabria Harrod<sup>2</sup>, Jonathan M. Snowden<sup>2,5</sup>, William Lambert<sup>5</sup>, Jeanne-Marie Guise<sup>2,3,5,6</sup>

<sup>1</sup>*Vanderbilt School of Medicine, Nashville, TN USA*

<sup>2</sup>*Department of Obstetrics & Gynecology, Oregon Health & Science University School of Medicine, Portland, OR USA*

<sup>3</sup>*Department of Emergency Medicine, Oregon Health & Science University School of Medicine, Portland, OR USA*

<sup>4</sup>*Office of Simulation, Oregon Health & Science University, Portland, OR USA*

<sup>5</sup>*Oregon Health & Science University-Portland State University School of Public Health, Portland, OR USA*

<sup>6</sup>*Department of Medical Informatics & Clinical Epidemiology, Oregon Health & Science University School of Medicine, Portland, OR USA*

**Keywords:** Patient Safety; Medical Errors; Cooperative Behavior; Patient Care Team; Emergency Medical Services; Teamwork; Patient Simulation; Child; Humans

**Corresponding Author:** Jeanne-Marie Guise, M.D., M.P.H., Department of Obstetrics & Gynecology, OHSU, Mail Code: L466, 3181 SW Sam Jackson Park Road, Portland, OR 97239. Tel: (503) 494-2101; Fax: (503) 494-5296; Email: guisej@ohsu.edu

**Word Count:** 2,616 (excluding title page, abstract, references, tables and figures)

## ABSTRACT

### Objectives

1  
2  
3 The goal of this study was to examine the relationship between measured teamwork and adverse  
4 safety events in the prehospital emergency care of children using high-fidelity simulation. We  
5  
6 posit that non-technical skills such as leadership, teamwork, situation awareness and decision  
7  
8 making are associated with the clinical success of teams.  
9  
10

## 11 **Design**

12  
13  
14  
15 Observational study.  
16

## 17 **Setting**

18  
19 Emergency Medical Services (EMS) responders were recruited from public fire and private  
20  
21 transport agencies in Oregon State to participate in four simulations of pediatric emergencies  
22  
23 using high-fidelity patient simulators, scene design, and professional actors playing parents and  
24  
25 bystanders.  
26  
27

## 28 **Participants**

29  
30  
31 Forty-four fire/transport teams consisting of 259 EMS professionals consented to participate and  
32  
33 completed simulations.  
34

## 35 **Primary and Secondary Outcome Measures**

36  
37 Teams were assessed using the CTS™, a validated instrument that measures overall teamwork  
38  
39 and 15 specific elements in 5 overarching domains: communication, decision making, role  
40  
41 responsibility (leadership and followership), situational awareness/resource management and  
42  
43 patient-friendliness. We used generalized estimating equations to estimate the odds of error with  
44  
45 increasing overall CTS™ teamwork score while adjusting for clinical scenario and potential  
46  
47 clustering by team.  
48  
49

## 50 **Results**

1  
2  
3 Across 176 simulations, the mean overall score on the CTS™ was 6.04 (SD = 2.10; range 1 =  
4 poor to 10 = perfect) and was normally distributed. The distribution of scores was similar across  
5  
6 the four clinical scenarios. At least one error was observed in 82% of the simulations. In  
7  
8 simulations with at least one observed error, the mean CTS™ score was 5.76 (SD = 2.04)  
9  
10 compared with 7.16 (SD = 1.95) in scenarios with no observed error. Logistic regression analysis  
11  
12 accounting for clustering at the team-level revealed that the odds of an error decreased 28% with  
13  
14 each unit increase in CTS™ (Odds Ratio = 0.72, 95% Confidence Interval 0.59 – 0.88).  
15  
16  
17  
18

### 19 **Conclusions**

20  
21 This study found that overall teamwork among care delivery teams was strongly associated with  
22  
23 the risk of serious adverse events in simulated scenarios of caring for critically ill and injured  
24  
25 children.  
26  
27  
28  
29  
30  
31  
32  
33  
34  
35  
36  
37  
38  
39  
40  
41  
42  
43  
44  
45  
46  
47  
48  
49  
50  
51  
52  
53  
54  
55  
56  
57  
58  
59  
60

## STRENGTHS AND LIMITATIONS OF THIS STUDY

- This research provides some of the first data that quantifies the relationship between clinical teamwork and the likelihood of medical errors in a pediatric prehospital setting.
- These data suggest CTS™ may be a useful tool to measure the immediate impact of interventions on teamwork that matter to the reduction of errors.
- Simulations replicated pediatric emergencies known to be high risk for errors and were conducted using professional actors and high fidelity pediatric simulators in the field with clinical EMS teams assembled and responding as they normally would reflecting every day clinical care as closely as possible.
- The appraisal of errors and assignment of teamwork scores were performed by clinicians who were not involved in EMS but were humans using their best judgement, which is a method subject to bias
- It remains uncertain whether poorer teamwork is the cause of errors or if it is simply associated with other deficits in performance that may be contributing, however, this finding provides a tool that can be used to measure impact before and after interventions.

## INTRODUCTION

Medical errors, are estimated to be the third leading cause of death in the United States (US) and the 14<sup>th</sup> leading cause worldwide.[1-3] The total aggregated cost of adverse safety events and errors is estimated to amount to trillions of dollars each year. [3] Medicine is both an important and imperfect field, combining science with art and humans with technology. In 1999, the world became aware that patients not only die from disease and traumatic events, some also die or are injured unintentionally through the provision of clinical care.[4] The landmark Institute of Medicine report estimated that the number of people who die every year due to preventable medical errors in the US alone, is equivalent to 3 jumbo jet crashes every 2 days, or one patient every 15 minutes, with over 1 million estimated to be harmed. Studies of medical errors have generally focused on adults and inpatient settings.[5-7] However, medical errors are also an important source of harm for pediatric patients with estimates of 70,000 pediatric inpatients harmed per year by medical errors.[8, 9] A more recent report, emphasizes that the cost of medical errors is proportionately more devastating to countries of low economic status.[10] Even less is known about the epidemiology, etiology, and risk factors for preventable adverse events in the care of children in the Emergency Medical Services (EMS) system where children first receive care for emergencies outside of the hospital.

Non-technical skills such as good communication and teamwork are critical in avoiding medical errors and assuring the safety of patients.[3] The World Health Organization considers communication to be the leading cause of unintentional patient harm.[11] Past reviews have indicated that aspects of teamwork such as leadership, teamwork, situation awareness and decision making are largely correlated with the clinical success of teams.[12-14] For example, a

1  
2  
3 study evaluating teamwork in the Intensive Care Unit indicated that 37% of teamwork failures  
4 were due to verbal communication errors between physicians and nurses.[15] There have been  
5 interventions to reduce medical errors such as implementing computerized provider order-entry  
6 systems, limiting residents' work shifts to consecutive hours, and implementing evidence-based  
7 care bundles. A large retrospective study from the US Veterans Affairs Hospital found that  
8 inpatient surgical mortality was reduced 18% following team training interventions.[16]  
9  
10 However, lack of prospective and detailed evaluation of teamwork elements and specific errors  
11 limit our understanding of the effectiveness of these practices.[17] The goal of this study was to  
12 examine the relationship between measured teamwork and adverse safety events in the  
13 prehospital emergency care of children using high-fidelity simulation.  
14  
15  
16  
17  
18  
19  
20  
21  
22  
23  
24  
25  
26  
27

## 28 **METHODS**

29 We followed STROBE guidance for reporting of observational studies.[18] The Oregon Health  
30 & Science University Institutional Review Board (IRB00006942) approved the study and all  
31 subjects signed both study and video consent prior to participation.  
32  
33  
34  
35  
36  
37  
38  
39

### 40 **Study Participants**

41 In total, 176 simulations were performed over a 6-month timeframe with 44 teams of emergency  
42 medical services (EMS) providers recruited from public fire and private transport crews in three  
43 large counties surrounding Portland, Oregon in the United States. Portland is the largest city in  
44 Oregon and the three county area that participated in this study serves a population of 1.8  
45 million. The EMS system in this region has dual-Advanced Life Support response to all 911  
46 calls with public fire agencies, responding in teams of 3-5 individuals with at least one  
47  
48  
49  
50  
51  
52  
53  
54  
55  
56  
57  
58  
59  
60

1  
2  
3 paramedic, and a private transport agency, responding in 2-person teams with at least one  
4 paramedic. We conducted all simulations in the field, using high-fidelity simulators, scene  
5 design, and professional actors playing roles of parents and bystanders, with both fire and  
6 transport EMS teams responding to each scenario as they normally would when providing  
7 clinical care. Participants ranged from Emergency Medical Technician (EMT) to paramedic,  
8 with each team including at least one paramedic.  
9

10  
11  
12  
13  
14  
15  
16  
17  
18  
19 Forty-four fire/transport teams consisting of 259 EMS professionals were available in the three-  
20 county region during our study timeframe and consented to participate. All who consented  
21 completed the study. One individual withdrew consent to have his/her individual data analyzed  
22 after completing the simulation sessions for personal reasons, but agreed to analysis of team-  
23 level data for all simulation sessions he/she had participated. In total, we analyzed team-level  
24 data from 44 teams and individual-level data from 258 EMS professionals.  
25  
26  
27  
28  
29  
30  
31  
32  
33  
34

### 35 **Patient Involvement**

36  
37 The EMS-C Children's Safety Initiative is an observational study with a specific focus on EMS  
38 providers. Patients were not involved in the design, recruitment, or conduct of the study.  
39  
40  
41  
42  
43

### 44 **Simulations**

45  
46 Each fire/ambulance team participated in four simulation scenarios: (1) cardiac arrest in newborn  
47 (Newborn Resuscitation Program, NRP), (2) cardiac arrest in child (Pediatric Advanced Life  
48 Support PALS), (3) non-accidental trauma (NAT), and (4) accidental trauma from pedestrian-  
49 motor vehicle collision (MVC). Simulations were developed by a diverse team with experience  
50  
51  
52  
53  
54  
55  
56  
57  
58  
59  
60



1  
2  
3 in patient safety, simulation, medical and EMS education, pediatric emergency medicine,  
4  
5 advanced life support training, and emergency medical services. Professional actors who each  
6  
7 had several years' experience working as standardized patients in simulations played the roles of  
8  
9 patients and family members. They read through a standardized script and the full simulations  
10  
11 and debriefings were beta tested exactly as they would run with participants with several EMS  
12  
13 teams in two different EMS agencies, not participating in the study. Simulations were conducted  
14  
15 in the field using high-fidelity simulators, scene design, and professional actors playing roles of  
16  
17 parents and bystanders. EMS crews responded in their agency vehicles after receiving a radio  
18  
19 dispatch. Simulators included Victoria™ birthing patient simulator and the Newborn Hal™  
20  
21 simulator from Gaumard™, and Sim Jr.™ 6-year-old child and sim NewB™ newborn simulators  
22  
23 from Laerdal™. Settings included street (motor vehicle collision or MVC), simulated apartment  
24  
25 bedroom for birth (neonatal resuscitation protocol or NRP), disheveled family room (neonatal  
26  
27 abuse trauma or NAT), simulated care facility for eight year old with cardiac arrest (pediatric  
28  
29 advanced life support or PALS) and all simulations were allowed to continue though transport in  
30  
31 the agency's own ambulances.  
32  
33  
34  
35  
36  
37  
38  
39

40 In the NRP scenario, the patient presented as a newborn who was initially responsive upon  
41  
42 delivery but subsequently developed a weak cry, flaccid extremities, bradycardia, and cyanosis  
43  
44 requiring resuscitation. For the PALS case, the patient presented as a six-year-old boy with  
45  
46 symptomatic bradycardia that progressed to pulseless electrical activity with a reported history of  
47  
48 developmental disabilities, seizures, and cerebral palsy, living in a care facility. In the NAT case,  
49  
50 a six-month-old patient had “fallen” from the couch and was unconscious and unresponsive with  
51  
52 bruising consistent with inflicted injury. In the MVC scenario, the patient was a three-month-old  
53  
54  
55  
56  
57  
58  
59  
60

1  
2  
3 child who, while in a stroller, was stuck by a car. The patient had a large scalp wound and was  
4  
5 initially crying but shortly after developed decreased responsiveness, hypertension, bradycardia,  
6  
7 and slow respirations. Makeup was used to simulate bruising, bleeding and lacerations in a  
8  
9 standardized manner for each scenario. Each scenario followed a previously determined  
10  
11 algorithm for improvement or decompensation of the patient's status along pre-specified time  
12  
13 intervals according to performance of specific critical actions also specified in advance. All  
14  
15 scenarios were pilot tested among EMS teams who did not subsequently participate in the study.  
16  
17 Scenarios were revised as needed based on feedback from pilot testing. Professionally trained  
18  
19 actors played all confederate roles in the scenarios to enhance realism.  
20  
21  
22  
23  
24  
25

26 For the purpose of standardization, simulation scenarios concluded after approximately 10  
27  
28 minutes. If the team initiated a procedure close to the 10-minute mark, such as calculating and  
29  
30 drawing up a medication, the simulation was allowed to continue to complete observation of the  
31  
32 task in process and reduce the chances of an awkward end to the scenario. If the care protocols  
33  
34 proceeded rapidly, and the condition of the patient was stable and transport action had begun, the  
35  
36 simulation could be concluded before the 10-minute point. After finishing all four scenarios,  
37  
38 teams returned for a 30-minute debriefing session.  
39  
40  
41  
42  
43

44 Simulation scenarios were presented to teams in random order to minimize the potential bias that  
45  
46 may occur from conditioning as teams become familiar with the simulators and working with  
47  
48 each other. Fire and transport crews responded to each scenario in their own fire engines and  
49  
50 ambulances after receiving a scripted radio dispatch. Each crew used their own equipment or  
51  
52 alternatively used training kits that were replicas of the kits they usually carry. The crews varied  
53  
54  
55  
56  
57  
58  
59  
60

1  
2  
3 who arrived on scene first (ambulance or fire department) and at times arrived simultaneously to  
4  
5 mimic local practice. Crews were able to move the patient simulators to the transport vehicle and  
6  
7 mimic patient transport to the hospital. If transport was started, the crews would assign a driver  
8  
9 and those who remained inside the transport vehicle would continue to administer patient care.  
10  
11 All crews were aware they were participating in simulated emergencies and were oriented to the  
12  
13 study and mannequins prior to participation. To allow for anonymous tracking of each  
14  
15 participant by role, the crew members wore colored tape markers on their shoulders. The fire  
16  
17 crews also varied the person-in-charge (PIC) assignment for each scenario, although the crew  
18  
19 membership was consistent.  
20  
21  
22  
23  
24  
25

## 26 **Data Collection**

27  
28 Prior to simulations, participants completed a survey asking about demographic characteristics,  
29  
30 training and their experience in Emergency Medical Services.  
31  
32  
33  
34

35 One of two subject matter experts (JMG & MH) experienced in using the Clinical Teamwork  
36  
37 Scale (CTS™) directly observed simulations in real time and measured teamwork using the  
38  
39 CTS™, a validated instrument that measures overall teamwork and 15 specific elements in 5  
40  
41 overarching domains in addition to overall teamwork: communication, decision making, role  
42  
43 responsibility (leadership and followership), situational awareness/resource management and  
44  
45 patient-friendliness.[19] CTS™ was selected because the authors were skilled in its use having  
46  
47 developed it over a decade ago with a diverse team (that included one of the founders of crew  
48  
49 resource management (CRM)), it was designed specifically to allow quick assessments of  
50  
51 teamwork during rapidly moving clinical emergencies, it is free, and has been successfully used  
52  
53  
54  
55  
56  
57  
58  
59  
60

1  
2  
3 by us and numerous others to measure teamwork in emergent clinical scenarios similar to our  
4 intended purpose: pediatric resuscitations, obstetrics, trauma, advanced cardiac life support, and  
5 emergency medical services.[20-27] Evaluators rate the performance of the care team using a  
6 Likert scale of zero (unacceptable) to 10 (perfect) and are given space to insert narrative  
7 comments. In validation studies, the CTS™ has demonstrated substantial score concordance  
8 among raters, and excellent interrater reliability.[26-28] A systematic review of tools that have  
9 been used to measure teamwork recently concluded that CTS™ was superior to other tools for  
10 measuring teamwork citing content and construct validity as well as reliability and ease of  
11 use.[29] Prior to the study, simulations were pilot tested with EMS teams not involved in the  
12 study. During this time, both reviewers scored teamwork independently using CTS™ arrived at  
13 consensus and repeated independent assessments of new simulations to arrive at consistency.  
14 Two reviewers were present, independently scored scenarios and came to consensus at the end of  
15 pilot tests and during more than half of all study simulations.

### 32 **Error Measurement**

33 During the simulations, the evaluators noted the number of errors and described what the error  
34 entailed using standard taxonomy. For purposes of this study, errors were collapsed into whether  
35 an error was present or not present. Similar to CTS, when both reviewers were present (>50% of  
36 the time) a consensus was reached at the end regarding errors. When there was uncertainty over  
37 whether an action may or may not have constituted an error, the team discussed to reach  
38 consensus. For the remaining scenarios, a single reviewer rated the errors.

### 50 **Statistical analysis**

1  
2  
3 A completed case analysis was used; due to missing data on key variables, 6 of 176 (3.4%) of  
4 simulation scenarios were dropped from analysis. We summarized error proportion by each  
5 simulated clinical scenario, and summarized teamwork (CTS™ teamwork score) by the presence  
6 or absence of an error. We summarized teamwork as the overall CTS™ score and also by each  
7 score in the five sub-domains of the CTS™. Scores were compared between groups using *t*-tests  
8 for unequal variances. A generalized estimating equation (GEE) logistic regression model was  
9 used to estimate the odds of error with increasing CTS™ score in SAS GENMOD (version 9.4  
10 SAS Institute Inc., Carey, NC). Although the order of the four simulation scenarios was  
11 randomized by EMS teams, in analysis we controlled for the potential correlation of errors by  
12 team using an exchangeable correlation structure clustered by teams. Our choice to use the  
13 exchangeable correlation structure also should be robust to errors in adjacent simulation  
14 scenarios and comparisons to those farther apart in time on the testing day, as well as scenarios  
15 that may share similar characteristics (e.g., same age of pediatric patient). assumes that the  
16 correlation between errors. We tested for confounding by scenario and years of EMS experience.  
17 A *p*-value of <0.05 was considered statistically significant.  
18  
19  
20  
21  
22  
23  
24  
25  
26  
27  
28  
29  
30  
31  
32  
33  
34  
35  
36  
37  
38  
39

## 40 RESULTS

41  
42 Table 1 shows demographic characteristics and self-reported professional experience of EMS  
43 responders participating in the simulation sessions.  
44  
45  
46  
47  
48  
49  
50  
51

52 **Table 1: Characteristics of EMS Personnel Participating in Simulations**

| Characteristic | N (%) |
|----------------|-------|
|----------------|-------|

|                                                                                      |      |        |
|--------------------------------------------------------------------------------------|------|--------|
| Mean Age years (S.D) <sup>a</sup>                                                    | 36.9 | (8.47) |
| Gender <sup>b</sup>                                                                  |      |        |
| Female                                                                               | 36   | (14.0) |
| Race/Ethnicity <sup>c</sup>                                                          |      |        |
| White                                                                                | 220  | (89.1) |
| Black or African American                                                            | 0    | (0)    |
| American Indian or Alaska Native                                                     | 6    | (2.43) |
| Asian                                                                                | 4    | (1.62) |
| Native Hawaiian or Other Pacific Islander                                            | 2    | (0.81) |
| Hispanic or Latino                                                                   | 7    | (2.83) |
| Other/Two or More Races                                                              | 8    | (3.24) |
| Training Level <sup>b</sup>                                                          |      |        |
| Emergency Medical Responder (EMR)                                                    | 0    | (0)    |
| Emergency Medical Technician (EMT)                                                   | 100  | (38.9) |
| Advanced EMT                                                                         | 2    | (0.78) |
| EMT-Intermediate                                                                     | 25   | (9.73) |
| Paramedic                                                                            | 128  | (49.8) |
| Paramedic Intern                                                                     | 2    | (0.78) |
| Years' Experience Working in EMS <sup>d</sup>                                        | 11.7 | (7.84) |
| Proficiency in Pediatric EMS on a Scale of 1 ("Novice") to 5 ("Expert") <sup>b</sup> | 2.55 | (0.89) |

a) n = 256, b) EMS n = 257, c) n = 247, d) n = 258

At least one error was observed in 82% of the 176 simulation scenarios for which the presence or absence of errors was recorded. Due to missing data for overall CTS™ score, data for six

scenarios were not included in the logistic regression analysis. Table 2 describes the types of errors observed.

**Table 2: Taxonomy of Observed Errors**

| <b>Errors</b>                             | <b>Type</b>                                                                 |
|-------------------------------------------|-----------------------------------------------------------------------------|
| <b><i>Diagnostic &amp; Management</i></b> | Assessment, algorithm, diagnostic, management, decision making              |
| <b><i>Medication</i></b>                  | Wrong medication, dose, route, sequence, type, IV fluid issue, etc.         |
| <b><i>Technical</i></b>                   | Wrong device, size, bagging, intubation, CPR, defibrillator, immobilization |
| <b><i>Scene/Environment</i></b>           | Scene safety, scene time, positioning, patient/family                       |

The overall CTS™ score was normally distributed, with a mean of 6.04 (SD = 2.10; min = 1 (poor) and max = 10 (perfect)) in the 170 simulations with recorded overall CTS™ scores. The distributions of overall CTS™ scores were similar across the four scenarios. In simulations with an overall CTS™ score and at least one observed error (n = 138), the mean CTS™ score was 5.76 (SD = 2.04) compared with 7.16 (SD = 1.95) in scenarios with no observed error (n = 32). The t tests demonstrated that this difference was statistically significant (p-value = 0.0007). For each individual simulation scenario, teams with no errors had higher CTS™ scores than teams with one or more errors. There were statistically significant differences in CTS™ scores between teams with no errors and teams with errors in the Non-Accidental Trauma simulation and the Newborn Cardiac Arrest simulation, with the no error teams having significantly greater CTS™ scores. Table 3 provides comparative data for CTS™ scores between teams with and without errors by simulation scenario.

**Table 3: Comparing CTS™ Overall Teamwork Score Between Teams With and Without Errors by Simulation Scenario**

| Simulation Scenario         | No Error   | One or More Errors | t <sup>+</sup> | P value |
|-----------------------------|------------|--------------------|----------------|---------|
|                             | (mean, SD) | (mean, SD)         |                |         |
| Motor Vehicle Collision     | 6.20(2.25) | 5.91(1.96)         | 0.37           | 0.72    |
| Non-Accidental Trauma       | 8.20(1.10) | 5.57(2.03)         | 4.39           | *0.0019 |
| Newborn Cardiac Arrest      | 7.55(1.97) | 5.79(2.18)         | 2.5            | *0.022  |
| Six-Year-Old Cardiac Arrest | 7.17(1.60) | 5.78(2.09)         | 1.88           | 0.097   |
| All Simulations             | 7.16(1.95) | 5.76(2.04)         | 3.61           | *0.0007 |

<sup>+</sup>Satterhwaite t-test for unequal variances

\*significant at alpha=0.05

After comparing an unadjusted GEE logistic regression model to a model controlling for scenario and mean years of EMS experience, there were no significant differences in the effect estimate for CTS™ score or significance of estimates (Table 4). This indicates that the relationship between overall CTS™ and odds of error was not confounded by scenario or years of EMS experience; thus, the final model reported is unadjusted for these variables. Logistic regression analysis accounting for clustering at the team-level revealed that the odds of an error decreased 28% with each unit increase in CTS™ (Odds Ratio = 0.72, 95% Confidence Interval 0.59 – 0.88).

**Table 4. GEE Logistic Regression Models Testing Associations between Teamwork and Errors**

| Predictor Variable          | Unadjusted |             |      |         | Adjusted <sup>+</sup> |              |       |         |
|-----------------------------|------------|-------------|------|---------|-----------------------|--------------|-------|---------|
|                             | OR         | 95% CI      | Z    | p-value | OR                    | 95% CI       | Z     | p-value |
| CTS Score (1-unit increase) | 0.72       | (0.59,0.88) | -3.2 | 0.0014  | 0.73                  | (0.59,0.89)  | -3.06 | 0.0022  |
| MVC                         | -          | -           | -    | -       | 0.45                  | (0.18,1.17)  | -1.63 | 0.1034  |
| NRP                         | -          | -           | -    | -       | 0.46                  | (0.20,1.04)  | -1.87 | 0.0618  |
| PALS                        | -          | -           | -    | -       | 0.88                  | (0.25,3.03)  | -0.21 | 0.8352  |
| NAT                         | -          | -           | -    | -       | REF                   | -            | -     | -       |
| Mean Years EMS Experience   | -          | -           | -    | -       | 0.92                  | (0.79, 1.07) | -1.07 | 0.284   |

<sup>+</sup>Adjusted for clinical scenario (NAT = reference group) and mean years of EMS experience at the team level



1  
2  
3 Within the simulations, the percentage of teams that completed a simulation without error was  
4 highest in the Newborn Cardiac Arrest simulation (25%). The simulation with the highest  
5  
6 highest in the Newborn Cardiac Arrest simulation (25%). The simulation with the highest  
7  
8 percentage of teams with one or more error was the Non-Accidental Trauma simulation, with  
9  
10 89% of simulation having at least one error. Bivariable analysis suggested that adverse safety  
11  
12 events are more likely in teams with low teamwork scores.  
13  
14

15  
16  
17 Adverse safety events were also more likely in teams with lower individual scores in  
18  
19 communication, situational awareness, decision-making, and leadership/followership (Table 5).  
20  
21

22  
23 **Table 5: CTS™ Domain-specific Ratings in Simulations with and without Any Observed**  
24 **Error**

| <b>Error</b>                                                | <b>CTS™ Item Rating</b>        |                                          |                |
|-------------------------------------------------------------|--------------------------------|------------------------------------------|----------------|
| <i>CTS™ Item</i>                                            | <i>No Error<br/>(mean, SD)</i> | <i>One or More Errors<br/>(mean, SD)</i> | <i>P Value</i> |
| Overall Communication <sup>a</sup>                          | 7.13 (2.21)                    | 5.89 (2.00)                              | 0.002          |
| Overall Situational Awareness <sup>b</sup>                  | 7.31 (2.07)                    | 6.26 (2.25)                              | 0.01           |
| Overall Decision Making <sup>c</sup>                        | 7.26 (2.07)                    | 5.49 (2.35)                              | <0.001         |
| Overall Role Responsibility<br>(Leader/Helper) <sup>d</sup> | 7.25 (1.74)                    | 6.06 (1.92)                              | 0.001          |
| Patient Friendliness <sup>d</sup>                           | 7.13 (2.56)                    | 6.44 (2.17)                              | 0.16           |

25  
26  
27  
28  
29  
30  
31  
32  
33  
34  
35  
36  
37  
38 a) n = 160, b) n = 170, c) n = 167, d) n = 163  
39  
40  
41

42 Compared with teams with one or more errors, teams without any errors had higher CTS™  
43  
44 scores across all itemized categories of the CTS™ (Overall Communication, Overall Situational  
45  
46 Awareness, Overall Decision making, Overall Role Responsibility, and Patient Friendliness).  
47  
48 Among these categories, teams with no error had significantly higher CTS™ scores for Overall  
49  
50 Communication, Overall Situational Awareness, Overall Decision Making, and Overall Role  
51  
52 Responsibility (Leadership/Helper).  
53  
54  
55  
56  
57  
58  
59  
60

## DISCUSSION

In this study of simulated pediatric prehospital emergencies, we observed a higher frequency of errors in teams with lower-rated teamwork scores. This finding was observed consistently across a variety of clinical scenarios (e.g., both newborn cardiac arrest and non-accidental trauma) and teamwork sub-domains (e.g., communication and situational awareness). Our study builds on the prior research on the role of teamwork in medical errors, which has mostly been conducted in the hospital setting.[30, 31] Using high-fidelity simulation scenarios and a validated teamwork measurement tool, we extended this research to the pediatric prehospital emergency care setting, and found an association between teamwork and medical errors.

The results were robust to multivariable regression adjustment, suggesting that breakdowns in teamwork are indeed a factor contributing to the high error rates observed in this study. These findings add strength to the WHO's description of communication as a leading cause of unintentional harm and further elaborate on the importance of teamwork in decreasing errors.[11] Additionally, These findings provide a nice complement to the work on surgical mortality and team training[16] as this provides a mechanism to measure the immediate intervening factors that are likely in the causal pathway.

Given the large cost and morbidity burden associated with medical errors worldwide, these findings suggest directions for future research and also have policy implications.[3, 10] Most immediately, however, more studies are needed to confirm this association both in this specific healthcare setting as well as other clinical areas where team-based care is the norm. For example, future studies should examine the contribution of teamwork to medical errors in hospital

1  
2  
3 emergency medical care to continue building our understanding of the role of teamwork beyond  
4 the ICU. Improving team work is a relatively low cost intervention to improve patient outcomes.  
5  
6 Thus this direction of research is important internationally, and may be particularly critical for  
7  
8 countries of low economic means, who are impacted heavily by the financial burdens. [10]  
9  
10  
11  
12  
13

14 We used a validated measure of teamwork, the CTST<sup>TM</sup>. CTST<sup>TM</sup> has been used around the world  
15 in different settings and clinical care areas. [26-28] Future studies should utilize this measure  
16 and also continue to refine methods for measuring the multi-modal concept of teamwork in  
17 health care systems around the world. Given the complexity of teamwork and the inherent  
18 challenges in measuring it (e.g., different evaluations based on different parties, the limitations of  
19 self-reported/self-scored data, etc.), additional research will be needed to provide a full picture of  
20 the role of teamwork in patient outcomes. In clinical settings where our findings are replicated, it  
21 will be essential to consider interventions, training, and policies to prevent teamwork-associated  
22 medical errors.  
23  
24  
25  
26  
27  
28  
29  
30  
31  
32  
33  
34  
35  
36  
37

38 There are several important limitations to consider. We conducted simulations and measured  
39 teamwork in one geographic region with a specific EMS system design which may not be  
40 representative of other areas. Although we employed best-practices in conducting our  
41 simulations and measuring teamwork (e.g., cutting-edge simulation models, the use of trained  
42 actors, a validated teamwork measurement scale), our study examined simulated healthcare  
43 encounters, rather than actual healthcare. However, due to the rare nature of critical pediatric  
44 emergencies in EMS, direct observation of care is not feasible on this scale. Next, we do not  
45 know if poorer teamwork is the cause of errors or if it is simply associated with other deficits in  
46  
47  
48  
49  
50  
51  
52  
53  
54  
55  
56  
57  
58  
59  
60

1  
2  
3 performance that may be contributing, such as medical knowledge. Further, the appraisal of  
4 errors and assignment of teamwork scores were performed by humans using their best  
5 judgement, which is a method subject to bias. Finally, while the amount of missing data were  
6 small, we dealt with missing data using complete-case analysis (170 complete of 176 available  
7 cases). The analytic approach to missing data continues to be a subject of active investigation  
8 with recent writings suggesting that the best approach is to think through the likely causes of bias  
9 and select the analytic method that is least likely to introduce bias and best able to reduce  
10 bias.[32] Although several options are available for addressing missingness (e.g., multiple  
11 imputation approaches), several features of our specific data raised questions about the  
12 applicability of these approaches in our study. Our data structure includes nested, non-  
13 independent observations, where the same clinical team participated in clinically distinct  
14 simulations and different clinical teams participated in each clinical simulation. Given this, it did  
15 not seem appropriate to impute scores from other clinical teams in the same clinical scenario to  
16 the team with missing data, as this would assume that the clinical performance of teams was  
17 homogeneous. In the same note, it did not seem appropriate to assume that one clinical team  
18 would perform similarly on clinical cases that were very distinct. Given that neither of these  
19 assumptions seemed appropriate and also that our total number of missing data was small, the  
20 most honest interpretation of our data seemed to be complete case analysis. In conclusion, we  
21 found that teamwork is highly correlated with errors in simulated pediatric prehospital  
22 emergencies and this finding was robust across four different simulation scenarios as well as  
23 across sub-domains of teamwork.

## 54 CONCLUSION

1  
2  
3 Overall teamwork is strongly associated with the risk of adverse events in critically ill and  
4  
5 injured children.  
6  
7  
8  
9  
10  
11  
12  
13  
14  
15  
16  
17  
18  
19  
20  
21  
22  
23  
24  
25  
26  
27  
28  
29  
30  
31  
32  
33  
34  
35  
36  
37  
38  
39  
40  
41  
42  
43  
44  
45  
46  
47  
48  
49  
50  
51  
52  
53  
54  
55  
56  
57  
58  
59  
60

For peer review only

## DECLARATIONS

### Acknowledgements

None

### Ethics approval and consent to participate

The study was approved by Oregon Health & Science University's Institutional Review Board, IRB Approval# 00006942.

### Competing interests

The authors have no conflict of interest to report.

### Funding

This work was supported by the National Institute of Child Health and Human Development, Grant No. 1R01HD062478.

**Data Sharing:** Aggregated data specific to this publication would be made available upon request.

**Author Contributions:** All authors contributed significantly to this work. SH is first author. JMG and WL obtained funding. SH, MH, BS, JS, JM, WL, and JMG conceived and designed the study. SH, MH, BS, JM, TH, WL, and JMG performed the simulations and participated in acquisition of data. SH, BS, AS, JS, WL, and JMG analyzed the data. SH, BS, JS, WL, and JMG wrote the first draft of the paper. SH, AS, WL, JS, and JMG conducted additional analyses and made revisions to the paper from peer review. All authors have read, edited, and approved the final manuscript and are able to accept responsibility for the work.

**REFERENCES CITED**

1. Quality Interagency Coordination Task Force. Doing what counts for patient safety: Federal actions to reduce medical errors and their impact. Rockville, MD: Agency for Healthcare and Research Quality; [cited 2017 May 12]. Available from: <https://archive.ahrq.gov/quic/report/mederr4.htm>
2. Makary M, Daniel M. Medical error-the third leading cause of death in the US. *BMJ*. 2016;353:i2139.
3. Slawomirski L, Auraaen A, Klazinga N. The economics of patient safety: Strengthening a value-based approach to reducing patient harm at national level. Paris, France: Organisation for Economic Co-operation and Development, 2017.
4. Committee on Quality of Health Care in America. To err is human: Building a safer health system. Institute of Medicine, editor. Washington, DC: National Academy Press; 1999.
5. Aranaz-Andres J, Aibar-Remon C, Vitaller-Burillo J, Requena-Puche J, Terol-Garcia E, Kelley E, et al. Impact and preventability of adverse events in Spanish public hospitals: results of the Spanish National Study of Adverse Events (ENEAS). *Int J Qual Health Care*. 2009;21(6):408-14.
6. Westbrook J, Li L, Lehnbohm E, Baysari MT, Braithwaite J, Burke R, et al. What are incident reports telling us? A comparative study at two Australian hospitals of medication errors identified at audit, detected by staff and reported to an incident system. *Int J Qual Health Care*. 2015;27(1):1-9.

- 1  
2  
3 7. Giraldo P, Sato L, Sala M, Comas M, Dywer K, Castells X. A retrospective review of  
4 medical errors adjudicated in court between 2002 and 2012 in Spain. *Int J Qual Health*  
5 *Care*. 2016;28(1):33-9.  
6  
7
- 8 8. Kaushal R, Bates D, Landrigan C. Medication errors and adverse drug events in pediatric  
9 inpatients. *JAMA*. 2001;285(16):2114-20.  
10  
11
- 12 9. Woods D, Thomas E, Holl J, al. e. Adverse events and preventable adverse events in  
13 children. *Pediatrics*. 2005;115(1):155-60.  
14  
15
- 16 10. National Academies of Sciences, Engineering and Medicine. *Crossing the Global Quality*  
17 *Chasm: Improving Health Care Worldwide*. Washington, DC: 2018.  
18  
19
- 20 11. Katzenbach J, Smith D. *The discipline of teams*. Boston, MA: Harvard Business Press;  
21 2008.  
22  
23
- 24 12. Baker D, Gustafson S, Beaubien J, al. e. *Medical teamwork and patient safety: The*  
25 *evidence-based relation*. Rockville, MD: Agency for Healthcare and Research Quality,  
26 2005.  
27  
28
- 29 13. Manser T. *Teamwork and patient safety in dynamic domains of healthcare: A review of*  
30 *the literature*. *Acta Anaesthesiol Scand*. 2009;53(2):143-51.  
31  
32
- 33 14. Sorbero M, Farley D, Mattke S, al. e. *Outcomes measures for effective teamwork in*  
34 *inpatient care*. Santa Monica, CA: RAND Corporation, 2008.  
35  
36
- 37 15. Donchin Y, Gopher D, Olin M, al. e. A look into the nature and causes of human errors in  
38 the intensive care unit. *Crit Care Med*. 1995;23(2):294-300.  
39  
40
- 41 16. Neily J, Mills P, Young-Xu Y, Carney B, West P, Berger D, et al. Association between  
42 implementation of a medical team training program and surgical mortality. *JAMA*.  
43 2010;304(15):1693-700.  
44  
45  
46  
47  
48  
49  
50  
51  
52  
53  
54  
55  
56  
57  
58  
59  
60



17. Landrigan C. Resident sleep deprivation and critical care: the unintended consequences of inaction. *Crit Care Med*. 2010;38(3):980-1.
18. von Elm E, Altman D, Egger M, Pocock S, Gøtzsche P, Vandenbroucke J. The Strengthening of Reporting of Observational Studies in Epidemiology (STROBE) statement: guidelines for reporting observational studies. *PLoS Med*. 2007;4(10):e296.
19. Guise J, Deering S, Kanki B, al. e. Validation of a tool to measure and promote clinical teamwork. *Simul Healthc*. 2008;3(4):217-23.
20. Gilfoyle E, Koot D, Annear J, Bhanji F, Cheng A, Duff J, et al. Improved Clinical Performance and Teamwork of Pediatric Interprofessional Resuscitation Teams With a Simulation-Based Educational Intervention. *Pediatr Crit Care Med*. 2017;18(2):e62-e9.
21. Lau Y, Chee D, Ab Hamid Z, Leong B, Lau S. Interprofessional Simulation-Based Advanced Cardiac Life Support Training: Video-Based Observational Study. *Clin Sim Nurs*. 2019;30:16-24.
22. Parush A, Mastoras G, Bhandari A, Momtahan K, Day K, Weitzman B, et al. Can teamwork and situational awareness (SA) in ED resuscitations be improved with a technological cognitive aid? Design and a pilot study of a team situation display. *J Biomed Inform*. 2017;76:154-61.
23. Ghazali D, Darmian-Rafei I, Ragot S, Oriot D. Performance Under Stress Conditions During Multidisciplinary Team Immersive Pediatric Simulations. *Pediatr Crit Care Med*. 2018;19(6):e270-e8.
24. Paull D, Deleeuw L, Wolk S, Paige J, Neily J, Mills P. The effect of simulation-based crew resource management training on measurable teamwork and communication among

- 1  
2  
3 interprofessional teams caring for postoperative patients. *J Contin Educ Nurs*.  
4  
5 2013;44(11):516-24.  
6  
7  
8 25. Letchworth P, Duffy S, Phillips D. Improving non-technical skills (teamwork) in post-  
9  
10 partum haemorrhage: A grouped randomised trial. *Eur J Obstet Gynecol Reproductive*  
11  
12 *Biol*. 2017;217:154-60.  
13  
14  
15 26. Fransen A, van de Ven J, Merien A, de Wit-Zuurendonk L, Houterman S, Mol B, et al.  
16  
17 Effect of obstetric team training on team performance and medical technical skills: a  
18  
19 randomised controlled trial. *BJOG*. 2012;119(11):1387-93.  
20  
21  
22 27. Miller D, Crandall C, Washington C, 3rd, McLaughlin S. Improving teamwork and  
23  
24 communication in trauma care through in situ simulations. *Acad Emerg Med*.  
25  
26 2012;19(5):608-12.  
27  
28  
29 28. Banga F, Truijens S, Fransen A, Dieleman J, van Runnard Heimel P, Oei G. The impact  
30  
31 of transmural multiprofessional simulation-based obstetric team training on perinatal  
32  
33 outcome and quality of care in the Netherlands. *BMC Med Educ*. 2014;14:175.  
34  
35  
36 29. Fransen A, de Boer L, Kienhorst D, Truijens S, van Runnard Heimel P, Oei S. Assessing  
37  
38 teamwork performance in obstetrics: A systematic search and review of validated tools.  
39  
40 *Eur J Obstet Gynecol Reproductive Biol*. 2017;216:184-91.  
41  
42  
43 30. van de Ven J, Houterman S, Steinweg R, Scherpbier A, Wijers W, Mol B, et al. Reducing  
44  
45 errors in health care: cost-effectiveness of multidisciplinary team training in obstetric  
46  
47 emergencies (TOSTI study); a randomised controlled trial. *BMC Preg Childbirth*.  
48  
49 2010;10:59.  
50  
51  
52  
53  
54  
55  
56  
57  
58  
59  
60

- 1  
2  
3 31. McCulloch P, Mishra A, Handa A, Dale T, Hirst G, Catchpole K. The effects of aviation-  
4 style non-technical skills training on technical performance and outcome in the operating  
5 theatre. Qual Safe Health Care. 2009;18(2):109-15.  
6  
7  
8  
9  
10 32. Dong Y, Peng C. Principled missing data methods for researchers. SpringerPlus.  
11  
12 2013;2(1):222.  
13  
14  
15  
16  
17  
18  
19  
20  
21  
22  
23  
24  
25  
26  
27  
28  
29  
30  
31  
32  
33  
34  
35  
36  
37  
38  
39  
40  
41  
42  
43  
44  
45  
46  
47  
48  
49  
50  
51  
52  
53  
54  
55  
56  
57  
58  
59  
60

For peer review only

## STROBE Statement—checklist of items that should be included in reports of observational studies

|                              | Item No | Recommendation                                                                                                                                                                                                                                                                                                                                                                                                                                                         | Page #   |
|------------------------------|---------|------------------------------------------------------------------------------------------------------------------------------------------------------------------------------------------------------------------------------------------------------------------------------------------------------------------------------------------------------------------------------------------------------------------------------------------------------------------------|----------|
| <b>Title and abstract</b>    | 1       | (a) Indicate the study's design with a commonly used term in the title or the abstract                                                                                                                                                                                                                                                                                                                                                                                 | 1        |
|                              |         | (b) Provide in the abstract an informative and balanced summary of what was done and what was found                                                                                                                                                                                                                                                                                                                                                                    | 2        |
| <b>Introduction</b>          |         |                                                                                                                                                                                                                                                                                                                                                                                                                                                                        |          |
| Background/rationale         | 2       | Explain the scientific background and rationale for the investigation being reported                                                                                                                                                                                                                                                                                                                                                                                   | 4-5      |
| Objectives                   | 3       | State specific objectives, including any prespecified hypotheses                                                                                                                                                                                                                                                                                                                                                                                                       | 5        |
| <b>Methods</b>               |         |                                                                                                                                                                                                                                                                                                                                                                                                                                                                        |          |
| Study design                 | 4       | Present key elements of study design early in the paper                                                                                                                                                                                                                                                                                                                                                                                                                | 5-6      |
| Setting                      | 5       | Describe the setting, locations, and relevant dates, including periods of recruitment, exposure, follow-up, and data collection                                                                                                                                                                                                                                                                                                                                        | 6        |
| Participants                 | 6       | (a) <i>Cohort study</i> —Give the eligibility criteria, and the sources and methods of selection of participants. Describe methods of follow-up<br><i>Case-control study</i> —Give the eligibility criteria, and the sources and methods of case ascertainment and control selection. Give the rationale for the choice of cases and controls<br><i>Cross-sectional study</i> —Give the eligibility criteria, and the sources and methods of selection of participants | 6        |
|                              |         | (b) <i>Cohort study</i> —For matched studies, give matching criteria and number of exposed and unexposed<br><i>Case-control study</i> —For matched studies, give matching criteria and the number of controls per case                                                                                                                                                                                                                                                 | NA       |
| Variables                    | 7       | Clearly define all outcomes, exposures, predictors, potential confounders, and effect modifiers. Give diagnostic criteria, if applicable                                                                                                                                                                                                                                                                                                                               | 7-10     |
| Data sources/<br>measurement | 8*      | For each variable of interest, give sources of data and details of methods of assessment (measurement). Describe comparability of assessment methods if there is more than one group                                                                                                                                                                                                                                                                                   | 9        |
| Bias                         | 9       | Describe any efforts to address potential sources of bias                                                                                                                                                                                                                                                                                                                                                                                                              | 8-9      |
| Study size                   | 10      | Explain how the study size was arrived at                                                                                                                                                                                                                                                                                                                                                                                                                              | 6-7      |
| Quantitative variables       | 11      | Explain how quantitative variables were handled in the analyses. If applicable, describe which groupings were chosen and why                                                                                                                                                                                                                                                                                                                                           | 10-11    |
| Statistical methods          | 12      | (a) Describe all statistical methods, including those used to control for confounding                                                                                                                                                                                                                                                                                                                                                                                  | 10-11    |
|                              |         | (b) Describe any methods used to examine subgroups and interactions                                                                                                                                                                                                                                                                                                                                                                                                    | 10-11    |
|                              |         | (c) Explain how missing data were addressed                                                                                                                                                                                                                                                                                                                                                                                                                            | 10,11,16 |
|                              |         | (d) <i>Cohort study</i> —If applicable, explain how loss to follow-up was addressed<br><i>Case-control study</i> —If applicable, explain how matching of cases and controls was addressed<br><i>Cross-sectional study</i> —If applicable, describe analytical methods taking account of sampling strategy                                                                                                                                                              | NA       |
|                              |         | (e) Describe any sensitivity analyses                                                                                                                                                                                                                                                                                                                                                                                                                                  | NA       |

Continued on next page

| <b>Results</b>           |     |                                                                                                                                                                                                              | <b>Page<br/>#</b> |
|--------------------------|-----|--------------------------------------------------------------------------------------------------------------------------------------------------------------------------------------------------------------|-------------------|
| Participants             | 13* | (a) Report numbers of individuals at each stage of study—eg numbers potentially eligible, examined for eligibility, confirmed eligible, included in the study, completing follow-up, and analysed            | 7                 |
|                          |     | (b) Give reasons for non-participation at each stage                                                                                                                                                         | 7                 |
|                          |     | (c) Consider use of a flow diagram                                                                                                                                                                           | NA                |
| Descriptive data         | 14* | (a) Give characteristics of study participants (eg demographic, clinical, social) and information on exposures and potential confounders                                                                     | 7,11,<br>12       |
|                          |     | (b) Indicate number of participants with missing data for each variable of interest                                                                                                                          | 12                |
|                          |     | (c) <i>Cohort study</i> —Summarise follow-up time (eg, average and total amount)                                                                                                                             | (NA)              |
| Outcome data             | 15* | <i>Cohort study</i> —Report numbers of outcome events or summary measures over time                                                                                                                          | (12-<br>15)       |
|                          |     | <i>Case-control study</i> —Report numbers in each exposure category, or summary measures of exposure                                                                                                         | NA                |
|                          |     | <i>Cross-sectional study</i> —Report numbers of outcome events or summary measures                                                                                                                           | NA                |
| Main results             | 16  | (a) Give unadjusted estimates and, if applicable, confounder-adjusted estimates and their precision (eg, 95% confidence interval). Make clear which confounders were adjusted for and why they were included | (12-<br>15)       |
|                          |     | (b) Report category boundaries when continuous variables were categorized                                                                                                                                    | (12-<br>15)       |
|                          |     | (c) If relevant, consider translating estimates of relative risk into absolute risk for a meaningful time period                                                                                             | NA                |
| Other analyses           | 17  | Report other analyses done—eg analyses of subgroups and interactions, and sensitivity analyses                                                                                                               | NA                |
| <b>Discussion</b>        |     |                                                                                                                                                                                                              |                   |
| Key results              | 18  | Summarise key results with reference to study objectives                                                                                                                                                     | 14-<br>15         |
| Limitations              | 19  | Discuss limitations of the study, taking into account sources of potential bias or imprecision. Discuss both direction and magnitude of any potential bias                                                   | 16                |
| Interpretation           | 20  | Give a cautious overall interpretation of results considering objectives, limitations, multiplicity of analyses, results from similar studies, and other relevant evidence                                   | 17                |
| Generalisability         | 21  | Discuss the generalisability (external validity) of the study results                                                                                                                                        | 15-<br>16         |
| <b>Other information</b> |     |                                                                                                                                                                                                              |                   |
| Funding                  | 22  | Give the source of funding and the role of the funders for the present study and, if applicable, for the original study on which the present article is based                                                | 18                |

\*Give information separately for cases and controls in case-control studies and, if applicable, for exposed and unexposed groups in cohort and cross-sectional studies.
